## 19 ABSTRACT

20 Hierarchical processing is pervasive in the brain, but its computational significance for learning in  
21 real-world conditions, with uncertainty and changes, is disputed. We show that previously proposed  
22 qualitative signatures which relied on reports of learned quantities or choices in simple experiments  
23 are insufficient to categorically distinguish hierarchical from non-hierarchical models of learning  
24 under uncertainty. Instead, we present a novel test which leverages a more complex task, whose  
25 hierarchical structure allows generalization between different statistics tracked in parallel. We use  
26 reports of confidence to quantitatively and qualitatively arbitrate between the two accounts of  
27 learning. Our results indicate that human subjects can track multiple, interdependent levels of  
28 uncertainty, and provide clear evidence for hierarchical processing, thereby challenging some  
29 influential neurocomputational accounts of learning.

## 30 INTRODUCTION

31 In real-world environments, learning is made difficult by at least two types of uncertainty (Yu &  
32 Dayan, 2005). First, there is inherent uncertainty in many real-world processes. For instance, the  
33 arrival of your daily commute may not be perfectly predictable but subject to occasional delays. Faced  
34 with such random fluctuations, learners should integrate as many observations as possible in order to  
35 obtain a stable, accurate estimate of the statistics of interest (e.g. the probability of delay) (Behrens,  
36 Woolrich, Walton, & Rushworth, 2007; Yu & Cohen, 2008). Second, there is the higher-order  
37 uncertainty related to sudden changes in those very statistics (*change points*). For instance,  
38 engineering works may increase the probability of delay for an extended period. When faced with a  
39 change point, learners should discount older observations and rely on recent ones instead, in order to  
40 flexibly update their estimate (Behrens et al., 2007; Mathys, Daunizeau, Friston, & Stephan, 2011;  
41 Nassar, Wilson, Heasly, & Gold, 2010).

42 Confronted with both forms of uncertainty, the optimal learning strategy is to track not only the  
43 statistics of interest but also the higher-order probability of change points. This enables learners to  
44 render their estimate stable when the environment is stable (i.e. between change points) and flexible  
45 when the environment changes (Behrens et al., 2007; Iigaya, 2016; Mathys et al., 2011; McGuire,  
46 Nassar, Gold, & Kable, 2014; Meyniel, Schlunegger, & Dehaene, 2015; Payzan-LeNestour &  
47 Bossaerts, 2011). Importantly, this approach assumes that learners use a *hierarchical generative*  
48 *model* of their environment. Such a model comprises multiple levels, of which lower levels depend on  
49 higher ones: current observations (level 1) are generated according to statistics of observations (level  
50 2) which themselves may undergo change points (level 3). The hierarchical approach is widely used to  
51 study learning in both health (Behrens et al., 2007; Iglesias et al., 2013) and disease (Lawson, Mathys,

52 & Rees, 2017; Powers, Mathys, & Corlett, 2017). However, efficient learning in dynamic  
53 environments is possible *without* tracking the likelihood of individual change points (Ritz, Nassar,  
54 Frank, & Shenhav, 2017; Ryali & Yu, 2016; Sutton, 1992; Wyart & Koechlin, 2016; Yu & Cohen,  
55 2008), and a large body of work indeed uses such a solution to model behavioral and brain responses  
56 (Bell, Summerfield, Morin, Malecek, & Ungerleider, 2016; Farashahi et al., 2017; Rescorla &  
57 Wagner, 1972). Computationally, this approach is very different as it assumes that learners do not take  
58 higher-level factors (e.g. change points) into account, and hence use a non-hierarchical or *flat* model  
59 of the world.

60 The possibility that the brain uses internal hierarchical models of the world is an active area of  
61 research in cognitive science (Tenenbaum, Kemp, Griffiths, & Goodman, 2011), and has important  
62 consequences for neurobiology, since hierarchical models (Friston, 2008; Lee & Mumford, 2003) and  
63 non-hierarchical ones (Farashahi et al., 2017; Yu & Cohen, 2008) require different neural  
64 architectures. In learning theory however, internal hierarchical models pose somewhat of a  
65 conundrum, being simultaneously assumed critical by some frameworks for learning under  
66 uncertainty (Behrens et al., 2007; Mathys et al., 2011; Meyniel, Schlunegger, et al., 2015) and  
67 unnecessary by others (Bell et al., 2016; Farashahi et al., 2017; Wyart & Koechlin, 2016; Yu & Cohen,  
68 2008). One possible explanation for this conundrum is that flat approximations to hierarchical  
69 solutions can be so efficient that both accounts become difficult to distinguish. Indeed, previous  
70 studies using quantitative model comparison reported conflicting results: some authors found that  
71 learning was best explained by hierarchical models (Iglesias et al., 2013; Lawson et al., 2017; Meyniel  
72 & Dehaene, 2017; Vinckier et al., 2016) while others found that flat models best explained their  
73 results (Bell et al., 2016; Farashahi et al., 2017; Summerfield, Behrens, & Koechlin, 2011). Here, we  
74 address this issue by developing a new way to test whether learners use a hierarchical model of the  
75 world. Specifically, we sought to find a method that relied not just on comparing model fits but that  
76 can detect *qualitative signatures* or *hallmarks* that are uniquely characteristic of an internal  
77 hierarchical model.

## 78 RESULTS

### 79 ***Modulations of apparent learning rate are not a hallmark of hierarchical processing***

80 Over and above the use of formal model comparison, earlier work on learning under uncertainty  
81 also influentially relied on demonstrations of qualitative signatures or hallmarks. In this context, a key  
82 feature of hierarchical models is the modulation of the learning rate by the changeability (or *volatility*)  
83 of the environment. One particularly influential demonstration of this principle in humans showed that  
84 the *apparent learning rate* — the ratio between the update size and the prediction error at any given  
85 observation — was modulated by change points (Behrens et al., 2007; Nassar et al., 2010). This was

86 argued a hallmark of hierarchical processing, since increasing the learning rate after change points  
87 would only be expected from a hierarchical learner (tracking both the statistics of observations and  
88 changes in those statistics) and not from a flat learner (tracking only the statistics). However, we show  
89 a counter-example: a flat learning model whose parameters are kept fixed and nevertheless shows  
90 systematic modulations of the apparent learning rate without actually tracking the higher-level  
91 likelihood of change points (Fig 1. and Methods). Although the modulations are smaller in the flat  
92 model than in the hierarchical one, they are qualitatively identical, demonstrating that such  
93 modulations are not uniquely characteristic of hierarchical models. This suggests that the presence of  
94 apparent learning rate modulations is not sufficiently specific, and that a new test must tap into a  
95 different property in order to reveal a true hallmark of hierarchical learning.

### 96 ***Simulations suggest confidence offers a sensitive metric to discriminate models***

97 When developing such a new test, the first question is what quantity or metric this test should  
98 target. In earlier studies, subjects tracked changing statistics such as the probability of a reward or a  
99 stimulus (Behrens et al., 2007; Bell et al., 2016; Gallistel, Krishan, Liu, Miller, & Latham, 2014;  
100 Iglesias et al., 2013; Jang et al., 2015; Vinckier et al., 2016), or the mean of some physical quantity  
101 like the location of a reward on an axis (McGuire et al., 2014) or its magnitude (Nassar et al., 2010).  
102 In those tasks, learning was probed either using choices that were supposedly guided by the learned  
103 statistics (Behrens et al., 2007; Bell et al., 2016; Iglesias et al., 2013; Summerfield et al., 2011;  
104 Vinckier et al., 2016) or using explicit reports of the learned statistics (Gallistel et al., 2014; McGuire  
105 et al., 2014; Meyniel, Schlunegger, et al., 2015; Nassar et al., 2010). Both choices and explicit reports  
106 are *first-order metrics*, as they only reflect the estimated statistics themselves. However, since a first-  
107 order metric only describes the level of observations, it may be seldom unique to a single model,  
108 especially if models aim at providing a good description of observations. By contrast, *second-order*  
109 *metrics*, such as the learner's confidence about her estimates, describe the learner's inference and may  
110 be more diagnostic about the underlying computations (Meyniel, Sigman, & Mainen, 2015). For  
111 illustration, we simulated a hierarchical and flat model in a probability learning problem (similar to  
112 the task used here, detailed below). Over a large range of possible task parameters, the probability  
113 estimates of the optimal hierarchical model and a near-optimal flat model were indeed highly  
114 correlated (Pearson  $\rho > 0.9$ ) whereas their confidence levels were much less correlated, potentially  
115 offering a more sensitive metric (see **Fig. S1** and Methods).

116 Altogether, our simulations demonstrate firstly that modulations of the apparent learning rate are  
117 not unique to hierarchical models and are thus not a hallmark of hierarchical learning (**Fig. 1**); and  
118 secondly, that a new test aiming to discriminate hierarchical from flat models can use learners'  
119 confidence about their estimates for doing so, since this metric is in theory more sensitive (**Fig. S1**).

## 120 ***A task allowing for a more direct test for an internal hierarchical model***

121 Based on the simulation results, we designed a new test that uses confidence to reveal clearly  
122 dissociable signatures of hierarchical and flat models of learning. Our new test builds on a task  
123 structure that has been used before (Meyniel, Schlunegger, and Dehaene 2015; Meyniel & Dehaene  
124 2017). The motivation for using this task is that participants must track *two* changing statistics  
125 governed by the same higher-order change points. This stands in contrast to most earlier tasks  
126 discussed above, which required subjects to monitor only one changing statistic and whose  
127 hierarchical structure was therefore less prominent. Such tasks may have been too simple to  
128 categorically distinguish hierarchical and flat accounts. Here, by using multiple statistics we can  
129 probe forms of transfer *between* estimated statistics that are truly unique to internal hierarchical  
130 models, as we will detail below.

131 In the task (see **Fig. 2A**), participants observed long sequences of two stimuli (A and B), the  
132 occurrence of which was governed by two transition probabilities which subjects had to learn:  $p(A_t|A_{t-1})$   
133 and  $p(B_t|B_{t-1})$ . The value of each probability was independent, but at unpredictable moments  
134 (*change points*) both simultaneously changed. Subjects were fully informed about this generative  
135 process. They passively observed the stimuli and were asked to report both their estimate of the  
136 transition probability leading to the next stimulus, and their confidence in this estimate.

## 137 ***Probability and confidence estimates closely follow a hierarchical ideal observer***

138 Before testing for an internal hierarchical model, we first wanted to verify whether subjects had  
139 performed the task well, in the sense that their responses were consistent with those of an ideal  
140 observer. As a benchmark, we used the optimal ideal observer; this model was not fitted onto  
141 subjects' data, but set so as to optimally solve the task by 'inverting' its hierarchical generative  
142 structure using Bayes' rule (see methods). As displayed in **Fig. 2B-C**, linear regressions between  
143 participants' responses and optimal values showed a tight agreement for probability estimates  
144 ( $\beta=0.66\pm 0.06$  s.e.m.,  $t_{22}=11.13$ ,  $p=1.7 \cdot 10^{-10}$ ), and for confidence reports ( $\beta=0.10\pm 0.03$  s.e.m.,  $t_{22}=$   
145  $3.06$ ,  $p=0.0058$ ); for further checks of robustness, see **Supplementary Results 2**. Despite being  
146 somewhat noisier, confidence reports also showed many properties of optimal inference (see  
147 **Supplementary Results 3**).

148 Since we propose that subjects' confidence reports are more diagnostic than their first-order  
149 estimates, the next thing we verified was that confidence reports indeed conveyed information that  
150 was not already conveyed implicitly by the first-order estimates. We tested this in our data by  
151 regressing out the (theoretically expected) covariance between subjects' confidence reports and  
152 several metrics derived from first-order estimates (see **Supplementary Results 3**); the residuals of  
153 this regression still co-varied with optimal confidence ( $\beta=0.028\pm 0.012$ ,  $t_{22}=2.3$ ,  $p=0.029$ ). This result  
154 was replicated by repeating the analysis on another dataset (Meyniel, Schlunegger, et al., 2015):

155  $\beta=0.023\pm 0.010$ ,  $t_{17}=2.2$ ,  $p=0.0436$ ; and also in the control experiment detailed below:  $\beta=0.015\pm 0.006$ ,  
156  $t_{20}=2.3$ ,  $p=0.034$ . These results indicate that subjective confidence and probability reports are not  
157 entirely redundant, and thus that confidence is worth investigating.

158 Having verified that confidence and probability reports closely followed estimates of an optimal  
159 hierarchical model, and that both metrics were not redundant, we then tested whether subjects'  
160 reports, overall, could not be better explained by a different, computationally less sophisticated model.  
161 We consider two models: the optimal hierarchical model (same as above) and a near-optimal flat  
162 model, akin to the delta-rule algorithm with a fixed learning rate (see Methods and **Supplementary**  
163 **Results 1**), that approximates the full Bayesian model extremely well. The models have the same  
164 number of free parameters, so model comparison boils down to comparing the goodness-of-fit. We  
165 first took the parameters that provide the best estimate of the true generative probabilities. The  
166 goodness-of-fit, assessed as mean square error (MSE) between subjects' and models' estimates, was  
167 better for the hierarchical model than for the flat model (paired difference of MSE, hierarchical minus  
168 flat:  $-0.0051\pm 0.0014$  s.e.m.,  $t_{22}=-3.7$ ,  $p=0.0013$ ). Note that subjects' estimates of volatility, a key task  
169 parameter here, usually deviate from the optimum and show a large variability (Nassar et al., 2010;  
170 Zhang & Yu, 2013), which could bias our conclusion. We therefore fitted the model parameters per  
171 subject, and we found that the difference in fit was even more significant ( $-0.0077\pm 0.0019$  s.e.m.,  $t_{22}=-$   
172  $3.97$ ,  $p=6.5 \cdot 10^{-4}$ ). This result replicates a previous finding (Meyniel & Dehaene, 2017). We then  
173 repeated the comparison for confidence levels. When model parameters were set to best estimate the  
174 true transition probabilities, the hierarchical model showed a trend toward a significantly lower MSE  
175 compared to the flat model (paired difference of MSE, hierarchical minus flat:  $-0.0017\pm 0.0010$  s.e.m.,  
176  $t_{22}=-1.8$ ,  $p=0.084$ ). When model parameters were fitted onto each subjects' confidence reports, this  
177 difference was significant ( $-0.0027\pm 0.0012$  s.e.m.,  $t_{22}=-2.36$ ,  $p=0.028$ ).

178 Altogether, these results show that participants successfully performed the task and that the  
179 hierarchical model was quantitatively superior to the flat model in explaining subjects' probability  
180 estimates and confidence ratings. This leaves us with the last and perhaps most important question:  
181 did subjects also show a *qualitative signature* that could only be explained by a hierarchical model?

### 182 ***Subjective confidence reveals a hallmark of an internal hierarchical model***

183 Identifying the qualitative signature proposed here was possible because our task involves two  
184 transition probabilities,  $P(A|A)$  and  $P(B|B)$ , whose changes were *coupled*, occurring simultaneously.  
185 In this context, a flat learner only estimates the value of each transition probability, while a  
186 hierarchical model *also* estimates the probability of a *global* change point. Faced with a global  
187 change point, the hierarchical learner then reacts optimally and makes its prior knowledge more  
188 malleable by becoming uncertain about *both*  $P(A|A)$  and  $P(B|B)$ . Importantly, using this mechanism,  
189 an internal hierarchical model should allow for generalization: if a change point is suspected after

190 observing just one type of transition (e.g. AAAAAAA, when  $P(A|A)$  was estimated to be low) a  
191 hierarchical learner would *also* become uncertain about the other quantity,  $P(B|B)$ , despite having  
192 acquired no direct evidence on this transition (**Fig. 3A**). Critically, this form of indirect inference is  
193 unique to hierarchical models and thus offers a powerful test of hierarchical theories of learning.

194 To test for this generalization effect, we focussed on streaks of repetitions, and distinguished  
195 between streaks that seem unlikely in context and may signal a change point (*suspicious streaks*) and  
196 streaks that do not (*non-suspicious streaks*). Stimulus sequences were carefully selected to contain  
197 enough suspicious and non-suspicious streaks and to control for confounds such as streak duration  
198 (see Methods). Questions were inserted just before and after the streak, so that subjects reported their  
199 estimate of (and confidence in) the other, non-repeating transition (**Fig. 3A**). Exact theoretical  
200 predictions for both models are found in **Fig. 3B**. In the the hierarchical model, confidence decreases  
201 strongly after suspicious, but much less after non-suspicious streaks. In the flat model, however, there  
202 is no such difference. Strikingly, subjective reports exactly followed the hierarchical account and  
203 falsified the flat one, see **Fig. 3C**: confidence decreased strongly after suspicious ( $-0.12 \pm 0.04$  s.e.m.,  
204  $t_{22} = -3.2$ ,  $p = 0.004$ ) but not after non-suspicious streaks ( $-0.02 \pm 0.03$  s.e.m.,  $t_{22} = -0.7$ ,  $p = 0.51$ ), and this  
205 interaction was significant (paired difference,  $0.10 \pm 0.03$  s.e.m.,  $t_{22} = 3.7$ ,  $p = 0.001$ ).

### 206 ***Various controls demonstrate the specificity of the effect on confidence***

207 We now rule out a series of potential confounding explanations. First, one concern is that the  
208 analysis above involves models that are optimized to estimate the true transition probabilities of the  
209 task: perhaps the predictions look different if we fit the models onto behaviour. However, our  
210 conclusions remain unaffected if we simulate models fitted onto each subject, (**Fig. S2 C, E**). Another  
211 concern is that our analyses assume subjects were tracking transition probabilities, while they may in  
212 fact have been tracking another (heuristic) quantity, perhaps using a flat model. Detailed analysis  
213 revealed that subjects did in fact track transition probabilities (see **Supplementary Results 3**) and that  
214 no heuristic flat model could explain the selective decrease of confidence (**Fig S2 B, D, F**).

215 One may also wonder whether the effect reported in **Fig. 3** about confidence is also found in  
216 another variable. Note that this would not invalidate our conclusion about the hierarchical nature of  
217 learning. **Fig. S3** shows that probability estimates (the ones about which confidence is reported and  
218 shown in **Fig. 3**) are not affected by streak types neither in subjects (paired difference between streak  
219 types,  $-0.01 \pm 0.02$  s.e.m.,  $t_{22} = -0.5$ ,  $p = 0.59$ ) nor in the hierarchical model ( $-0.01 \pm 0.01$  s.e.m.,  $t_{22} = -1.4$ ,  
220  $p = 0.17$ ). A more subtle effect is that, when a change point is suspected, generalization should lead to  
221 reset the estimate of the unobserved transition probability, which should thus get closer to the prior  
222 value 0.5. However, this effect is less straightforward, because the estimated transition probability  
223 may already be close to 0.5 before the streak, such that an effect of streak type on the distance to the  
224 prior may be difficult to detect. Indeed, in the hierarchical model, streak type had only a weak effect

225 (paired difference,  $0.02 \pm 0.01$  sem,  $t_{22}=2.9$ ,  $p=0.008$ ). For comparison, the same effect on confidence  
226 (**Fig. 3**) had  $t_{22}=11.7$ ,  $p=6.9 \cdot 10^{-11}$ . The expectedly weaker effect of streak type on the distance to the  
227 prior was not detected in participants ( $-0.0036 \pm 0.01$  sem,  $t_{22}=-0.3$ ,  $p=0.76$ ). We also tested reaction  
228 times since they often co-vary with confidence. Here, when the optimal confidence was lower,  
229 subjects took longer to respond to the prediction question (slope of reaction times vs. optimal  
230 confidence:  $-0.57 \pm 0.19$  s.e.m.,  $t_{22}=-3.07$ ,  $p=0.005$ ), but not to the confidence question (slope:  
231  $0.04 \pm 0.08$  sem,  $t_{22}=0.48$ ,  $p=0.64$ ). However, there was no effect of streak type on reaction times both  
232 for the probability estimate and reports (paired difference between streak types, both  $p>0.27$ ).

233 A final alternative explanation for the effect shown in **Fig. 3** is that suspicious streaks were more  
234 surprising and that subjects may become *generally uncertain* after surprising events. In this case, the  
235 effect would not reflect hierarchical inference but simply general surprise. We therefore performed a  
236 control experiment in which both probabilities changed independently: here, suspicious streaks were  
237 equally surprising but no longer signalled a *global* change point (**Fig. 4A**). Indeed, generalization of a  
238 decrease in confidence was no longer observed for the hierarchical model or in subjects (paired  
239 difference between suspicious and non-suspicious streaks:  $0.03 \pm 0.02$  s.e.m.,  $t_{20}=1.5$ ,  $p=0.15$ ), see **Fig.**  
240 **4B**. This absence of effect in the control task is significantly different from the effect found in the  
241 main task (difference of paired differences, two-sample t-test,  $t_{42}=-2.03$ ,  $p=0.048$ ). This difference is  
242 not due poor performance in the control experiment (see **Fig 4C**): linear regression between the  
243 optimal hierarchical model for uncoupled change (the ideal observer in this task) and subjects showed  
244 a tight agreement for both predictions ( $\beta=0.61 \pm 0.06$  s.e.m.,  $t_{20}= 10.27$ ,  $p=2 \cdot 10^{-9}$ ) and confidence  
245 ( $\beta=0.08 \pm 0.01$  s.e.m.,  $t_{20}= 6.83$ ,  $p=1.2 \cdot 10^{-6}$ ), as in the main task (see **Fig. 1 B, C**). The difference  
246 between the two tasks shows an effect of higher-level factors (coupled vs. uncoupled change points)  
247 and thus constitutes further evidence for a hierarchical model. Altogether, learners generalize from  
248 inferring the change of one probability to decreasing their confidence in the estimate of another  
249 probability, but only when they know the changes are coupled and it is thus adaptive to do so. This  
250 supports that the result in **Fig. 3 and 4** is a hallmark of an internal hierarchical model, and does not  
251 reflect a simpler, heuristic inference.

## 252 DISCUSSION

253 We have shown that some previous tests are insufficient to categorically distinguish hierarchical  
254 from non-hierarchical models of learning in uncertain and changing environments, and we introduced  
255 a novel test to dissociate the two. The key features of our experiment are that subjects estimate two  
256 statistics that depend upon the same change points, and that we analyse the subjects' confidence about  
257 their estimation. Our test taps into a unique property of hierarchical models: the ability to generalise  
258 between different probabilities that are coupled by the higher-order structure of the task. As such, both  
259 classes of theories make *qualitatively different predictions* at the level of individual trials. Based on



260 both qualitative and quantitative model comparison, our results provide clear evidence in support of a  
261 hierarchical account of adaptive learning in humans. These results indicate that humans can track  
262 multiple levels of uncertainty that are hierarchically organized, including the uncertainty about their  
263 own inference.

#### 264 ***Quantitative vs. qualitative model comparison***

265 A widely used method for contrasting competing models is quantitative model comparison.  
266 Following this approach, multiple models are fit onto the subjects' data, and the model that achieves  
267 the best fit with respect to its complexity is deemed most likely (Gelman et al., 2013; Stephan, Penny,  
268 Daunizeau, Moran, & Friston, 2009). This approach is attractive because it is generally applicable and  
269 it provides a common metric (e.g. goodness-of-fit, Bayes-Factor, exceedance probability) to compare  
270 different models. This approach nevertheless needs to be supplemented for at least two reasons. First,  
271 quantitative model comparison only allows for relative conclusions, such as one model being *better*  
272 *than the other tested models*, but it does not allow for more general conclusions such as the  
273 *falsification* of one model (Palminteri, Wyart, and Koechlin 2017). Moreover, it is not always clear  
274 what underlying factors are contributing to differences in the models' goodness-of-fit, and whether  
275 these factors are indeed most relevant to the question at hand. A complimentary approach, is to  
276 analyse specific, critical trials for the presence of *qualitative signatures* or *hallmarks* that uniquely  
277 identify or exclude one type of model. Such signatures are appealing because they are easily  
278 interpretable and they directly reflect a critical theoretical distinction. Previous prominent examples of  
279 the use of qualitative tests include the influential two-step task used to distinguish model-based from  
280 model-free reinforcement learning (Daw, Gershman, Seymour, Dayan, & Dolan, 2011). Here, both  
281 approaches are indeed complementary: quantitative model comparison provided evidence in favor of  
282 a hierarchical account of learning, and the qualitative approach tested for unique hallmarks and  
283 thereby falsified a flat account.

#### 284 ***Which behavioral metrics best reveal the learner's computations?***

285 A feature that distinguishes our task from previous studies is the use of explicit confidence ratings  
286 to test a key dissociation between flat and hierarchical models (**Fig. 3**). Our rationale was that since  
287 the flat models considered here are known to provide very accurate first-order approximations to  
288 hierarchical (optimal) models (Meyniel, Maheu, & Dehaene, 2016; Sutton, 1992; Yu & Cohen, 2008),  
289 we should opt for another variable that is less correlated between models. Choices and first-order  
290 reports are often used in behavioral science, but other metrics like subject's confidence and reaction  
291 times also proved useful to study cognition, see (Shadlen & Kiani, 2013). Here, our simulations  
292 showed that confidence is less correlated between models, we therefore took confidence as a window  
293 on the learner's computations.

294 In principle it should be possible to use other metrics to probe the same effect. Reaction times are  
295 one obvious candidate, inasmuch they are often an implicit measure of the subject's uncertainty  
296 (Dotan, Meyniel, & Dehaene, 2017; Kepecs & Mainen, 2012; Kepecs, Uchida, Zariwala, & Mainen,  
297 2008; Kiani, Corthell, & Shadlen, 2014). In our study, we found a correlation between reaction times  
298 and confidence, but no effect of streak type that serves as our hallmark signature. In our study, in  
299 contrast to accumulation (Kiani et al., 2014) or waiting-time (Kepecs et al., 2008) paradigms, there is  
300 no principled reason for reaction times to co-vary with confidence, which may explain why reaction  
301 times do not show the hallmark signature of a hierarchical inference.

302 Another candidate is the *apparent learning rate*. Previous studies reported modulations of the  
303 apparent learning rate by change points (Behrens et al., 2007; Nassar et al., 2010). The optimal,  
304 hierarchical model indeed shows such modulations because its updates are confidence-weighted  
305 (Mathys et al., 2011; Meyniel & Dehaene, 2017): for a given prediction error, its updates are larger  
306 when confidence about prior estimates is lower, which is typically the case when a change point is  
307 suspected. However, we found that in simple experiments that require to monitor only the frequency  
308 of a stimulus or a reward, a flat model could exhibit similar modulations, which are therefore not  
309 diagnostic of a hierarchical inference. In more complex experiments like the one here, the apparent  
310 learning rate could nevertheless show our hallmark signature of a hierarchical inference. Our  
311 theoretical analysis supports this hypothesis (see **Supplementary Results 4**) but we cannot assess it  
312 in our data, since this analysis requires a trial-by-trial measure of the apparent learning rate, and thus  
313 trial-by-trial (not occasional) reports of first-order estimates. A trial-by-trial measure of the apparent  
314 learning rate is neither accessible if subjects make choices at each trial. In such studies (Behrens et al.,  
315 2007; Glaze, Kable, & Gold, 2015), the authors could only use choices to compute an apparent  
316 learning rate in a sliding window of trials but this analysis lacks the trial-by-trial resolution. In our  
317 task, one could investigate the apparent learning rate of subjects, but that would require subjects to  
318 report their probability estimates after each trial, and hence to constantly interrupt the stimulus stream.  
319 This would probably interfere with the participants' ability to integrate consecutive observations,  
320 which is critical for tracking transition probabilities, and therefore seems difficult to implement in  
321 practice. Furthermore, if an effect of streak type were observed on the apparent learning rate, it would  
322 probably be mediated by the subject's confidence (Mathys et al., 2011; Meyniel & Dehaene, 2017), in  
323 that case one may prefer to probe confidence directly.

324 We acknowledge that there are drawbacks of using confidence as the metric of interest. In theory,  
325 confidence more reliably discriminates flat and hierarchical models; but in practice we found that the  
326 agreement between participants and the ideal observer was considerably more precise for probability  
327 estimates than for confidence ratings (see **Fig. 3B-C** and **Fig 4C**). This noisy character of confidence  
328 measurements was also reported previously (Baranski & Petrusic, 1994; Maniscalco & Lau, 2012;  
329 Meyniel, Schlunegger, et al., 2015; Zylberberg, Barttfeld, & Sigman, 2012), it may hinder the use of

330 confidence as a metric to discriminate between models, and it may explain that the difference in  
331 overall model fit between the flat and hierarchical model here was weaker for confidence than for  
332 probability estimates. This problem may be even worse when using an indirect indicator of  
333 confidence, such as reaction times or the apparent learning rate.

### 334 ***Learning in a structured environment***

335 Our qualitative test for a hierarchical inference also leverages a particular task structure: the  
336 higher-level dependence of generative statistics upon the same (or distinct, in the control experiment)  
337 change points. Our task structure is more complex than experiments that require to monitor only one  
338 generative statistics (Behrens et al., 2007; Gallistel et al., 2014; Iglesias et al., 2013; Kheifets &  
339 Gallistel, 2012; McGuire et al., 2014; Nassar et al., 2010). Our task structure may constrain the  
340 applicability and generality of our experiment, but it has a certain ecological appeal since in real-life  
341 situations, multiple regularities are often embedded in a single context. We believe that more complex  
342 task structures are suited to distinguish complex computations and approximations. Both are likely to  
343 be equivalent in simpler experiments, whereas in highly structured environments with multiple  
344 interdependent levels (Schapiro, Rogers, Cordova, Turk-Browne, & Botvinick, 2013; Tenenbaum et  
345 al., 2011), an optimal learning algorithm can hardly obviate the hierarchical nature of the problem to  
346 solve.

347 An interesting and difficult problem that we leave unaddressed here is how subjects may discover  
348 the task structure (Pouget, Beck, Ma, & Latham, 2013; Tenenbaum et al., 2011; Tervo, Tenenbaum, &  
349 Gershman, 2016). In our task, the optimal hierarchical model is able to correctly identify the current  
350 task structure (coupled vs. uncoupled change points), but only with moderate certainty even after  
351 observing the entire experiment presented to one subject (log-likelihood ratios range from 2 to 5  
352 depending on subjects). Therefore, in principle, subjects who are not endowed with optimal  
353 computing power cannot identify reliably the correct structure from observations alone. We speculate  
354 that in real-life situations, some cues or priors inform subjects about the relevant dependencies in their  
355 environment; if true, then our experiment in which subjects were instructed about the correct task  
356 structure may have some ecological validity.

357 Interestingly, while the importance of hierarchical inference remains controversial in the learning  
358 literature (Bell et al., 2016; Farashahi et al., 2017; Gallistel et al., 2014; Iglesias et al., 2013; Mathys  
359 et al., 2011; McGuire et al., 2014; Nassar et al., 2010; Ritz et al., 2017; Ryali & Yu, 2016;  
360 Summerfield et al., 2011; Wyart & Koehlin, 2016), it seems more clearly established in the domain  
361 of decision making and action planning (Balaguer, Spiers, Hassabis, & Summerfield, 2016; Daw et  
362 al., 2011; Huys et al., 2012; Keramati, Smittenaar, Dolan, & Dayan, 2016; Schapiro et al., 2013;  
363 Wunderlich, Dayan, & Dolan, 2012). For instance, it was suggested that the functional organization of  
364 cognitive control is nested: low level cues trigger particular actions, depending on a stimulus-response

365 association which is itself selected depending on a particular context (Koechlin, Ody, & Kouneiher,  
366 2003). In this view, negative outcomes may indicate that the (higher-level) context has changed and  
367 thus that a new rule now applies. This inference even seems to be confidence-weighted in humans: the  
368 suspicion of a change in context is all the stronger that subjects were confident that their action should  
369 have yielded a positive outcome under the previous context (Purcell & Kiani, 2016). Those two  
370 studies feature an important aspect of hierarchy: a succession of (higher-level) task contexts separated  
371 by change points governs the (lower-level) stimuli. Our task also leverages another feature of  
372 hierarchy: it allows generalization and transfer of knowledge. A rule learned in a particular context  
373 can be applied in other contexts, for instance see (Collins, Cavanagh, & Frank, 2014; Collins & Frank,  
374 2016). Our results go beyond a mere transfer: they show that the brain can *update* a statistics in the  
375 absence of direct evidence thanks to higher-level dependencies.

### 376 ***Possible neural implementation for adaptive learning***

377 Our results falsify a flat account of learning in our task, therefore they also falsify the possible use  
378 of a simple leaky integration by neural networks to solve this task. Leaky integration is often deemed  
379 both plausible biologically and computationally efficient (Farashahi et al., 2017; Glaze et al., 2015;  
380 Rescorla & Wagner, 1972; Yu & Cohen, 2008). A sophisticated version of the leaky integration with  
381 metaplastic synapses allows partial modulation of the apparent learning of the network, without  
382 tracking change points or volatility (Farashahi et al., 2017). Others have suggested that computational  
383 noise itself could enable a flat inference to automatically adapt to volatility (Wyart & Koechlin, 2016).  
384 Those approximate solutions dismiss the need to compute higher-level factors like volatility, they are  
385 thus appealing due to their simplicity; however, we believe that such solutions cannot explain the  
386 generalization afforded by hierarchical inference that we showed here. We nevertheless acknowledge  
387 that it is unlikely that only one algorithm subserves all forms of learning in the brain, and therefore  
388 that our result does not dismiss the possibility that the brain resorts to flat, simpler and yet efficient  
389 algorithms like the delta rule in many situations. One previously proposed bio-inspired model seems  
390 compatible with our result (Iigaya, 2016). This model comprises two modules: one for learning and  
391 the other for detecting change points, or “unexpected surprise” (Yu & Dayan, 2005). When a change  
392 point is detected, a reset signal is sent to the learning module. Converging evidence indicates that  
393 noradrenaline could play such a role (Bouret & Sara, 2005; Nieuwenhuis, Aston-Jones, & Cohen,  
394 2005; Salgado, Treviño, & Atzori, 2016; Schomaker & Meeter, 2015). A global reset signal could  
395 promote learning for the two transition probabilities that are maintained in parallel in our task, thereby  
396 allowing the reset of both when only one arouses the suspicion of a change point. Such a hypothesis  
397 nevertheless needs to be refined in order to account for the fact that the two statistics can also be reset  
398 independently from one another, as in the control task.

399 We hope that the test which we propose for hierarchy here will be applied to other learning model

400 that computes uncertainty, and even to non-human animals despite significant methodological  
401 challenges, and therefore that it will be of interest to experimentalists and theoreticians alike.

## 402 MATERIALS AND METHODS

### 403 *Participants*

404 Participants were recruited by public advertisement. They gave a written informed consent prior to  
405 participating and received 20 euros for volunteering in the experiment. The study was approved by the  
406 local Ethics Committee (CPP n°08–021 Ile de France VII). 26 participants (17 female, mean age 23.8,  
407 s.e.m.: 0.49) performed the main task and 21 other participants performed the control task (11 female,  
408 mean age 23.0, s.e.m.: 0.59). We excluded participants who showed poor learning performance, which  
409 we quantified as the Pearson  $\rho$  coefficient between their probability estimates and the ideal observer's  
410 estimates. We used a threshold corresponding to 5% of the (lowest) values measured in this task  
411 ( $\rho < 0.18$ , from a total of 105 participants in this study and others) This excluded 3 subjects from the  
412 main task, and none from the control task.

### 413 *Main Task*

414 The task was run using Octave (Version 3.4.2) and PsychToolBox (Version 3.0.11). Each  
415 participant completed a total of 5 blocks: 1 training block and 4 experimental blocks (2 auditory, 2  
416 visual). Auditory and visual blocks alternated, with the modality of the first block randomised across  
417 participants. In each block, we presented binary sequences of 380 stimuli (1520 total) denoted A and  
418 B, which were either visual symbols or sounds and were perceived without ambiguity.

419 Sequences were generated according to the same principles as in previous studies (Meyniel &  
420 Dehaene, 2017; Meyniel, Schlunegger, et al., 2015). A and B were randomly drawn based on two  
421 hidden transition probabilities which subjects had to learn. These probabilities were stable only for a  
422 limited time. The length of stable periods was randomly sampled from a geometric distribution with  
423 average length of 75 stimuli, truncated at 300 stimuli to avoid overly long stable periods. Critically,  
424 and contrary to other studies (Behrens et al., 2007) the volatility was thus fixed (at  $1/75$ ). Transition  
425 probabilities were sampled independently and uniformly between 0.1-0.9, with the constraint that, for  
426 at least one of the two probabilities, the change in odd ratio ( $p/1-p$ ) between consecutive stable  
427 periods was at least fourfold, thus guaranteeing that the change was effective. Across sequences and  
428 subjects, the actually used generative values indeed covered the transition probability matrix 0.1-0.9  
429 uniformly, without any correlation (Pearson  $\rho = -0.0009$ ,  $p = 0.98$ ). Occasionally, the sequence was  
430 interrupted and subjects had to estimate the probability that the next stimulus would be either an A or  
431 a B and report their confidence in that estimate. Questions were located quasi-randomly, semi-  
432 periodically once each 15 stimuli on average (100 in total). Of the 100 questions, 68 questions were  
433 randomly placed; the remaining 32 questions were intentionally located just before and after 16  
434 selected streaks (8 suspicious, 8 non-suspicious) and functioned as pre/post-questions to evaluate the

435 effect of these streaks (see **Fig. 3**). For details on the definition and selection of suspicious/non-  
436 suspicious streaks, see below.

437 To familiarize participants with the task they were carefully instructed and performed one training  
438 block of 380 stimuli (or ~12 minutes). To make sure they were fully aware of the volatile nature of the  
439 generative process, participants had to report when they detected changes in the hidden regularities. In  
440 the experimental blocks, reporting change points was omitted, but participants knew the underlying  
441 generative process was the same.

#### 442 ***Control Task***

443 The control task was very similar to the main one, with only two differences. (1) When a change  
444 occurred, it impacted only one of the two transition probabilities (randomly chosen). (2) During the  
445 training block, when subjects were required to report when they detected change points, they also  
446 reported which of the two transition probabilities had changed.

#### 447 ***Selection of sequences***

448 Each randomly generated sequence was evaluated computationally and carefully selected to  
449 ensure that each subject encountered enough target moments during which the models make  
450 qualitatively different predictions, and that all sequences were balanced in terms of potential  
451 confounds such as streak duration and location. To this end, 4 random sequences of 380 stimuli long  
452 (each corresponding to one block) were analyzed computationally with the hierarchical and flat  
453 learning models, yielding 4 simulated ‘blocks’. The sequences, and associated trial-by-trial transition  
454 probability estimates from both models, were concatenated to form a single experimental sequence (of  
455 1520 stimuli). This experimental sequence was then submitted to several selection criteria. First, we  
456 assessed whether the sequence contained at least 8 suspicious and 8 non-suspicious ‘streaks’.  
457 Consecutive repetitions were defined as ‘streaks’ if they consisted of at least 7 or more stimuli, and  
458 started after the 15th stimulus of a block. Streaks were classified as ‘suspicious’ if they aroused the  
459 suspicion of a change in the hierarchical ideal observer. Computationally, this was defined via the  
460 confidence in the probability of the observed repetition decreasing at least once during the streak.  
461 Following this criterion, even streaks of repetitions are that just slightly surprising are considered  
462 ‘suspicious’. To ensure the effect would be observable, only sequences in which the suspicious streaks  
463 led to a sizeable decrease in theoretical confidence levels were selected. Due to an error in the  
464 selection procedure, one sequence was included for which the theoretically expected average decrease  
465 in confidence after non-suspicious streaks was in fact larger than that after suspicious streaks. Because  
466 the corresponding subject who observed this sequence did show sufficient learning performance and  
467 hence added valuable data to all other analyses, we decided not to exclude the participant from the  
468 study. Importantly, excluding this subject does not change any conclusion or significance level of the

469 statistical tests reported here.

470 To control for factors that may potentially confound decreases in confidence, only sequences in  
471 which the average duration of suspicious and non-suspicious streaks was approximately identical, and  
472 in which there was at least one streak of each type in each block, were selected. In addition, subjects  
473 were not informed about the distinction between suspicious and non-suspicious streaks or that  
474 between random questions and pre-post questions that targeted the critical moments before and after  
475 streaks. Interviews performed after the experiment ruled out that subjects understood the goal of the  
476 experiment, as no subject had noticed that a sizable fraction (~30%) of questions purposefully  
477 targeted streaks.

### 478 ***Ideal observer models***

479 The models used in this study are implemented in a Matlab toolbox available on GitHub and  
480 described in a previous publication (Meyniel et al., 2016). The model termed “hierarchical” and “flat”  
481 here correspond respectively to the hidden Markov model (HMM) and the leaky integrator model in  
482 the toolbox. Here, we summarize the essential aspects of those models.

483 The hierarchical and flat models (M) are both ideal observer models: they use Bayes rule to  
484 estimate the posterior distribution of the statistic they estimate,  $\theta_t$ , based on a prior on this statistic and  
485 the likelihood provided by previous observations,  $y_{1:t}$  (here, a sequence of As and Bs):

$$486 \quad p(\theta_t | y_{1:t}, M) \propto p(y_{1:t} | \theta_t, M) p(\theta_t, M) \quad (\text{Eq 1})$$

487 Subscripts denote the observation number within a sequence. In the main text, the models estimate  
488 the transition probabilities between successive stimuli, so that  $\theta$  is a vector with two elements:  $\theta =$   
489  $[p(A|A), p(B|B)]$ . Note that those two probabilities suffice to describe all transitions, since the others  
490 can be derived as  $p(B|A) = 1-p(A|A)$  and  $p(A|B) = 1-p(B|B)$ . In **Fig. S2**, we also consider variants in  
491 which the model estimate another statistic, the frequency of stimuli:  $\theta = p(A)$ . Note that  $p(B)$  is simply  
492  $1-p(A)$ .

493 The estimation of  $\theta$  depends on the assumption of the ideal observer model (M). The flat model  
494 considers that  $\theta$  is fixed, and evaluates its value based on a leaky count of observations. The internal  
495 representation of this model therefore has only one level:  $\theta$ , the statistic of observations. When the  
496 true generative statistic is in fact changing over time, the leakiness of the model enables it to  
497 constantly adapt its estimate of the statistic and therefore to cope with changes. If the leakiness is  
498 tuned to the rate of change, the estimate can approach optimality (see **Fig. S1A**).

499 By contrast, the hierarchical model entertains the assumption that  $\theta$  can abruptly change at any  
500 moment. The internal representation of the model therefore has several levels beyond observations: a  
501 level characterizing the statistic of observations at a given moment ( $\theta_t$ ) and a level describing the



502 probability that of a change in  $\theta$  occurs ( $p_c$ ). Conceivably, there could be higher-order levels  
 503 describing changes in  $p_c$  itself (Behrens et al., 2007); however this sophistication is unnecessary here  
 504 and we consider that  $p_c$  is fixed.

505 Flat model

506 The flat model assumes that the true value of  $\theta$  is fixed, and it constantly infers its value given the  
 507 evidence received. Therefore, the likelihood function can be decomposed as follows:

$$\begin{aligned}
 508 \quad p(y_{1:t}|\theta) &= p(y_1|\theta) \prod_{i=2}^t p(y_i|\theta, y_{i-1}) \\
 &= \frac{1}{2} \left[ \theta_{A|A}^{N_{A|A}} (1 - \theta_{A|A})^{N_{B|A}} \right] \left[ \theta_{B|B}^{N_{B|B}} (1 - \theta_{B|B})^{N_{A|B}} \right]
 \end{aligned}
 \tag{Eq 2}$$

509 Where  $N_{A|A}(t)$  denotes the number of AA pairs in the sequence  $y_{1:t}$ . A convenient parametrization  
 510 for the prior distribution is the beta distribution:  $p(\theta) = \text{Beta}(\theta_{A|A} | N_{A|A}^{\text{prior}}, N_{B|A}^{\text{prior}})$ . This  
 511 parametrization allows for an intuitive interpretation of  $N_{A|A}^{\text{prior}}$  and  $N_{B|A}^{\text{prior}}$  as prior observation  
 512 counts, and due to its conjugacy with the likelihood function (Eq2), inserting Eq2 into Eq1 yields that  
 513 the posterior probability of  $\theta$  is the product of two beta functions:

$$\begin{aligned}
 p(\theta|y_{1:t}) &\propto \frac{1}{2} \text{Beta}(\theta_{A|A} | N_{A|A} + N_{A|A}^{\text{prior}}, N_{B|A} + N_{B|A}^{\text{prior}}) \text{Beta}(\theta_{B|B} | N_{B|B} + N_{B|B}^{\text{prior}}, N_{A|B} + N_{A|B}^{\text{prior}}) \\
 514 &
 \end{aligned}
 \tag{Eq 3}$$

515 We consider here that the count of observations (the number of AA and BB pairs) is leaky, so that  
 516 observations that are further in the past have a lower weight than recent ones. We modeled this  
 517 leakiness as an exponential decay  $\omega$ , such that the  $k$ -th past stimulus has a weight  $e^{-k/\omega}$ . Note a perfect  
 518 integration, in which all observations are given the same weight, corresponds to the special case with  
 519  $\omega$  being infinitely large. Also note that  $\omega \cdot \ln(2)$  corresponds to the “half-life”, i.e. the number of  
 520 observations after which the weight of a past observation is reduced by half.

521 In the main text (but **Fig. 1**), we choose  $[N_{A|A}^{\text{prior}}, N_{B|B}^{\text{prior}}] = [0 \ 0]$ , for in this case, the mean  
 522 estimate of the flat model becomes strictly equivalent to the estimate of a “delta rule” as the number  
 523 of observations increases (see **Supplementary Result 1**). An alternative choice for the prior is the so-  
 524 called Laplace-Bayes prior  $[1 \ 1]$ , which is uninformative in that it gives the same prior probability to  
 525 any value of  $\theta$  (Gelman et al., 2013). This choice is important for **Fig. 1**, but not for the results in the  
 526 main text (see **Fig S2**).

527 Hierarchical model

528 The hierarchical model evaluates the current value of the generative statistic  $\theta$  under the

529 assumption that it may change at any new observation with a fixed probability  $p_c$ . Note that, would the  
530 location of the change points be known, the inference of  $\theta$  would be simple: one would simply need to  
531 count the number of pairs ( $N_{A|A}$ ,  $N_{B|B}$ ,  $N_{A|B}$ ,  $N_{B|A}$ ) since the last change point and apply Eq. 2. However,  
532 without knowing the location of change points, one should in principle average the estimates given all  
533 possible locations of change points, which is in practice far too large a number. The computation is  
534 rendered tractable by the so-called Markov property of the generative process. If one knows  $\theta$  at time  
535  $t$ , then the next observation  $y_{t+1}$  is generated with  $\theta_{t+1} = \theta_t$  if no change occurred and with another value  
536 drawn from the prior distribution otherwise. Therefore, if one knows  $\theta_t$ , previous observations are not  
537 needed to estimate  $\theta_{t+1}$ . Casting the generative process as a Hidden Markov Model (HMM) enables to  
538 compute the joint distribution of  $\theta$  and observations iteratively, starting from the prior, and updating  
539 this distribution by moving forward in the sequence of observations:

$$540 \quad p(\theta_{t+1}, y_{1:t+1}) = p(y_{t+1} | \theta_{t+1}, y_t) \int p(\theta_t, y_{1:t}) p(\theta_{t+1} | \theta_t) d\theta_t \quad (\text{Eq 4})$$

541 This integral can be computed numerically by discretization on a grid. The posterior probability  
542 can be obtained by normalizing this joint distribution.

543 Probability reports and confidence ratings with the models

544 Both the flat and hierarchical models estimate a full posterior distribution for  $\theta$ , therefore both  
545 models have a posterior uncertainty (or conversely, confidence) about their estimate. In that sense, the  
546 flat model can be considered as a delta rule that is extended to provide confidence estimates about  
547 first-order estimates (see **Supplementary Results 1** for more details about the flat model and delta  
548 rule).

549 The probability of the next stimulus (question #1 asked to subjects) was computed from the  
550 posterior using Bayes rule:

$$551 \quad p(y_{t+1} | y_{1:t}) = \int p(y_{t+1} | \theta_{t+1}, y_t) p(\theta_{t+1} | y_{1:t}) d\theta_{t+1} \quad (\text{Eq 5})$$

552 Note that the first term in the integral, the likelihood, is nothing but the relevant transition  
553 probability itself (conditioned on the actual previous observation). This integral is therefore simply  
554 the mean of the posterior distribution of the relevant transition probability. The confidence in the  
555 reported probability estimate (question #2) was computed as the log-precision of this posterior  
556 distribution (Meyniel & Dehaene, 2017; Meyniel, Schlunegger, et al., 2015; Meyniel, Sigman, et al.,  
557 2015).

## 558 **Model fit**

559 The flat and the hierarchical models have one free parameter each, respectively  $\omega$  (the leakiness)

560 and  $p_c$  (the prior probability of change point).

561 Unless stated otherwise, the analysis reported in the main text used the parameters that best fit the  
562 true probabilities used to generate the sequences of observations presented to subjects. More precisely,  
563 for each sequence of observations, we computed the probability of each new observation given the  
564 previous ones, as estimated by the models using Eq. 5 and we compared it to the true generative  
565 probability. We adjusted the free parameters  $\omega$  and  $p_c$  with grid-search to minimize the sum of squared  
566 errors (SSE) over all the sequences used for all subjects. The resulting values,  $\omega=20.3$  and  $p_c=0.014$   
567 (indeed close to the generative value  $1/75$ ).

568 We also fitted the parameters to the responses of each subject (**Fig. S2**). For probability estimates,  
569 the above grid-search procedure was repeated after replacing generative values with the subject's  
570 estimates of probabilities at the moment of questions. For confidence reports, we used a similar  
571 procedure; note however that subjects used a bounded qualitative slider to report confidence whereas  
572 the model confidence is numeric and unbounded, so that there is not a direct mapping between the  
573 two. Therefore, the SSE was computed with the residuals of a linear regression between subject's  
574 confidence and the model's confidence.

### 575 ***Statistical analyses***

576 All linear regressions between dependent variables (e.g. probability estimates, confidence ratings)  
577 and explanatory variables (optimal estimates of probabilities and confidence, surprise, prediction  
578 error, entropy) included a constant and were estimated at the subject level. The significance of  
579 regression coefficients was estimated at the group level with t-tests. For multiple regressions,  
580 explanatory variables were z-scored so that regression coefficients can be compared between the  
581 variable of a given regression. Unless stated otherwise, all t-tests are two-tailed.

### 582 ***Availability of data and code***

583 The source data for all participants is available as supplementary information. The code to  
584 compute the ideal observers is available on GitHub:

585 <https://github.com/florentmeyniel/MinimalTransitionProbsModel>

## 586 **ACKNOWLEDGEMENTS**

587 We wish to thank Stefano Palminteri, Maxime Maheu, Peter Latham and Alexandre Pouget for  
588 useful comments on this work, and Bas Cornelissen for his help with Figure 3.

589 This work was supported by CEA (FM) and VSB Fund, Prins Bernhard Cultuurfonds and Institut  
590 français des Pays-Bas Descartes fellowships (MH).

## 591 REFERENCES

- Balaguer J, Spiers H, Hassabis D, Summerfield C (2016) Neural Mechanisms of Hierarchical Planning in a Virtual Subway Network. *Neuron* 90:893–903.
- Baranski JV, Petrusic WM (1994) The calibration and resolution of confidence in perceptual judgments. *Percept Psychophys* 55:412–428.
- Behrens TEJ, Woolrich MW, Walton ME, Rushworth MFS (2007) Learning the value of information in an uncertain world. *Nat Neurosci* 10:1214–1221.
- Bell AH, Summerfield C, Morin EL, Malecek NJ, Ungerleider LG (2016) Encoding of Stimulus Probability in Macaque Inferior Temporal Cortex. *Curr Biol* 26:2280–2290.
- Bouret S, Sara SJ (2005) Network reset: a simplified overarching theory of locus coeruleus noradrenaline function. *Trends Neurosci* 28:574–582.
- Collins AGE, Cavanagh JF, Frank MJ (2014) Human EEG Uncovers Latent Generalizable Rule Structure during Learning. *J Neurosci* 34:4677–4685.
- Collins AGE, Frank MJ (2016) Neural signature of hierarchically structured expectations predicts clustering and transfer of rule sets in reinforcement learning. *Cognition* 152:160–169.
- Daw ND, Gershman SJ, Seymour B, Dayan P, Dolan RJ (2011) Model-Based Influences on Humans' Choices and Striatal Prediction Errors. *Neuron* 69:1204–1215.
- Dotan D, Meyniel F, Dehaene S (2017) On-line confidence monitoring during decision making. *Cognition* 171:112–121.
- Farashahi S, Donahue CH, Khorsand P, Seo H, Lee D, Soltani A (2017) Metaplasticity as a Neural Substrate for Adaptive Learning and Choice under Uncertainty. *Neuron* 94:401–414.e6.
- Friston K (2008) Hierarchical models in the brain. *PLoS Comput Biol* 4:e1000211.
- Gallistel CR, Krishan M, Liu Y, Miller R, Latham PE (2014) The perception of probability. *Psychol Rev* 121:96–123.
- Gelman A, Carlin JB, Stern HS, Dunson DB, Vehtari A, Rubin DB (2013) *Bayesian Data Analysis, Third Edition*. CRC Press.
- Glaze CM, Kable JW, Gold JJ (2015) Normative evidence accumulation in unpredictable environments. *eLife* 4.
- Huys QJM, Eshel N, O'Nions E, Sheridan L, Dayan P, Roiser JP (2012) Bonsai Trees in Your Head: How the Pavlovian System Sculpts Goal-Directed Choices by Pruning Decision Trees. *PLoS Comput Biol* 8:e1002410.
- Iglesias S, Mathys C, Brodersen KH, Kasper L, Piccirelli M, den Ouden HEM, Stephan KE (2013) Hierarchical prediction errors in midbrain and basal forebrain during sensory learning. *Neuron* 80:519–530.
- Iigaya K (2016) Adaptive learning and decision-making under uncertainty by metaplastic synapses

- guided by a surprise detection system. *eLife* 5.
- Jang AI, Costa VD, Rudebeck PH, Chudasama Y, Murray EA, Averbeck BB (2015) The Role of Frontal Cortical and Medial-Temporal Lobe Brain Areas in Learning a Bayesian Prior Belief on Reversals. *J Neurosci* 35:11751–11760.
- Kepecs A, Mainen ZF (2012) A computational framework for the study of confidence in humans and animals. *Philos Trans R Soc B Biol Sci* 367:1322–1337.
- Kepecs A, Uchida N, Zariwala HA, Mainen ZF (2008) Neural correlates, computation and behavioural impact of decision confidence. *Nature* 455:227–231.
- Keramati M, Smittenaar P, Dolan RJ, Dayan P (2016) Adaptive integration of habits into depth-limited planning defines a habitual-goal-directed spectrum. *Proc Natl Acad Sci U S A*.
- Kheifets A, Gallistel CR (2012) Mice take calculated risks. *Proc Natl Acad Sci* 109:8776–8779.
- Kiani R, Corthell L, Shadlen MN (2014) Choice Certainty Is Informed by Both Evidence and Decision Time. *Neuron* 84:1329–1342.
- Koechlin E, Ody C, Kouneiher F (2003) The Architecture of Cognitive Control in the Human Prefrontal Cortex. *Science* 302:1181–1185.
- Lawson RP, Mathys C, Rees G (2017) Adults with autism overestimate the volatility of the sensory environment. *Nat Neurosci* 20:1293–1299.
- Lee TS, Mumford D (2003) Hierarchical Bayesian inference in the visual cortex. *J Opt Soc Am A Opt Image Sci Vis* 20:1434–1448.
- Maniscalco B, Lau H (2012) A signal detection theoretic approach for estimating metacognitive sensitivity from confidence ratings. *Conscious Cogn* 21:422–430.
- Mathys C, Daunizeau J, Friston KJ, Stephan KE (2011) A bayesian foundation for individual learning under uncertainty. *Front Hum Neurosci* 5:39.
- McGuire JT, Nassar MR, Gold JI, Kable JW (2014) Functionally Dissociable Influences on Learning Rate in a Dynamic Environment. *Neuron* 84:870–881.
- Meyniel F, Dehaene S (2017) Brain networks for confidence weighting and hierarchical inference during probabilistic learning. *Proc Natl Acad Sci*:201615773.
- Meyniel F, Maheu M, Dehaene S (2016) Human Inferences about Sequences: A Minimal Transition Probability Model. *PLoS Comput Biol* 12:e1005260.
- Meyniel F, Schlunegger D, Dehaene S (2015a) The Sense of Confidence during Probabilistic Learning: A Normative Account. *PLoS Comput Biol* 11:e1004305.
- Meyniel F, Sigman M, Mainen ZF (2015b) Confidence as Bayesian Probability: From Neural Origins to Behavior. *Neuron* 88:78–92.
- Nassar MR, Wilson RC, Heasly B, Gold JI (2010) An Approximately Bayesian Delta-Rule Model Explains the Dynamics of Belief Updating in a Changing Environment. *J Neurosci* 30:12366–12378.
- Nieuwenhuis S, Aston-Jones G, Cohen JD (2005) Decision making, the P3, and the locus coeruleus--

- norepinephrine system. *Psychol Bull* 131:510–532.
- Payzan-LeNestour E, Bossaerts P (2011) Risk, Unexpected Uncertainty, and Estimation Uncertainty: Bayesian Learning in Unstable Settings. *PLoS Comput Biol* 7:e1001048.
- Pouget A, Beck JM, Ma WJ, Latham PE (2013) Probabilistic brains: knowns and unknowns. *Nat Neurosci* 16:1170–1178.
- Powers AR, Mathys C, Corlett PR (2017) Pavlovian conditioning-induced hallucinations result from overweighting of perceptual priors. *Science* 357:596–600.
- Purcell BA, Kiani R (2016) Hierarchical decision processes that operate over distinct timescales underlie choice and changes in strategy. *Proc Natl Acad Sci U S A* 113:E4531-4540.
- Rescorla Robert A, Wagner Allan R (1972) A theory of Pavlovian conditioning: Variations in the effectiveness of reinforcement and nonreinforcement. In: *Classical conditioning II: Current research and theory* (AH., Black, & W.F., Prokasy WF, Back AH, eds), pp 64–99. New York Appleton-Century Crofts.
- Ritz H, Nassar MR, Frank MJ, Shenhav A (2017) A control theoretic model of adaptive behavior in dynamic environments. *bioRxiv*. doi: <https://doi.org/10.1101/204271>
- Ryali CK, Yu AJ (2016) Change-point detection without needing to detect change-points? *bioRxiv*. <https://doi.org/10.1101/077719>.
- Salgado H, Treviño M, Atzori M (2016) Layer- and area-specific actions of norepinephrine on cortical synaptic transmission. *Brain Res* 1641:163–176.
- Schapiro AC, Rogers TT, Cordova NI, Turk-Browne NB, Botvinick MM (2013) Neural representations of events arise from temporal community structure. *Nat Neurosci* 16:486–492.
- Schomaker J, Meeter M (2015) Short- and long-lasting consequences of novelty, deviance and surprise on brain and cognition. *Neurosci Biobehav Rev* 55:268–279.
- Shadlen MN, Kiani R (2013) Decision Making as a Window on Cognition. *Neuron* 80:791–806.
- Shannon, C. E. (1948). A mathematical theory of communication. *The Bell System Technical Journal*, 27, 379–423.
- Stephan KE, Penny WD, Daunizeau J, Moran RJ, Friston KJ (2009) Bayesian model selection for group studies. *NeuroImage* 46:1004–1017.
- Summerfield C, Behrens TE, Koechlin E (2011) Perceptual Classification in a Rapidly Changing Environment. *Neuron* 71:725–736.
- Sutton R (1992) Gain Adaptation Beats Least Squares? In: *In Proceedings of the 7th Yale Workshop on Adaptive and Learning Systems*, pp 161–166.
- Tenenbaum JB, Kemp C, Griffiths TL, Goodman ND (2011) How to grow a mind: statistics, structure, and abstraction. *Science* 331:1279–1285.
- Tervo DGR, Tenenbaum JB, Gershman SJ (2016) Toward the neural implementation of structure learning. *Curr Opin Neurobiol* 37:99–105.
- Vinckier F, Gaillard R, Palminteri S, Rigoux L, Salvador A, Fornito A, Adapa R, Krebs MO,

- Pessiglione M, Fletcher PC (2016) Confidence and psychosis: a neuro-computational account of contingency learning disruption by NMDA blockade. *Mol Psychiatry* 21:946–955.
- Wunderlich K, Dayan P, Dolan RJ (2012) Mapping value based planning and extensively trained choice in the human brain. *Nat Neurosci* 15:786–791.
- Wyart V, Koechlin E (2016) Choice variability and suboptimality in uncertain environments. *Curr Opin Behav Sci* 11:109–115.
- Yu AJ, Cohen JD (2008) Sequential effects: Superstition or rational behavior? *Adv Neural Inf Process Syst* 21:1873–1880.
- Yu AJ, Dayan P (2005) Uncertainty, neuromodulation, and attention. *Neuron* 46:681–692.
- Zhang S, Yu AJ (2013) Forgetful Bayes and myopic planning: Human learning and decision-making in a bandit setting. In: *Advances in Neural Information Processing Systems* 26.
- Zylberberg A, Barttfeld P, Sigman M (2012) The construction of confidence in a perceptual decision. *Front Integr Neurosci* 6±

## 592 FIGURES AND LEGENDS

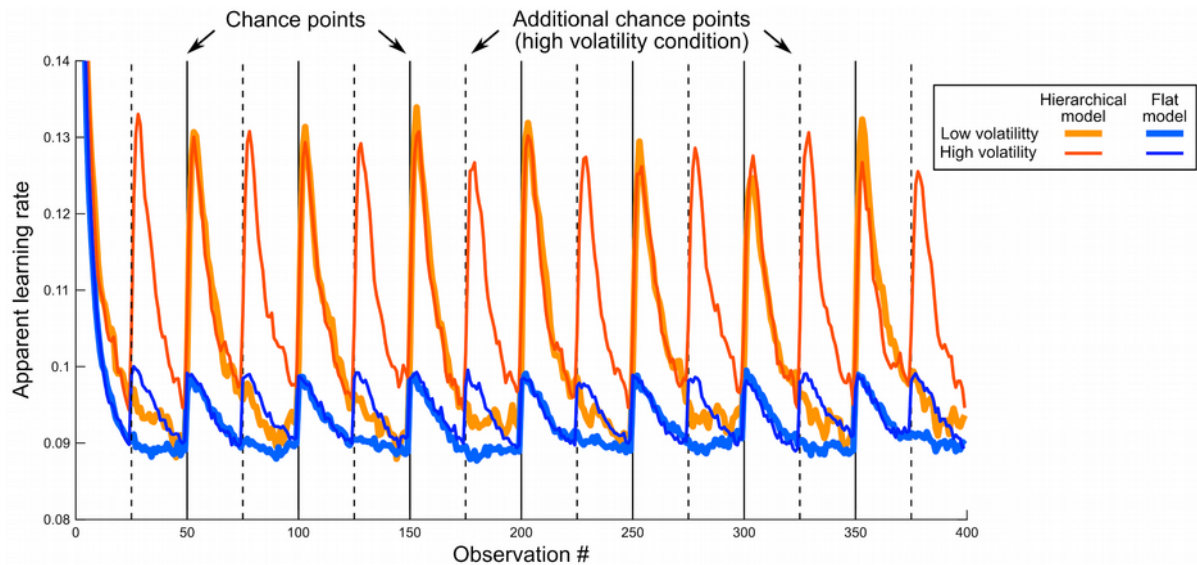

593 **Figure 1. Apparent learning rate modulations in previous designs are not a hallmark of**  
594 **hierarchical processing**

595 This simulation is inspired by a previous study (Behrens et al., 2007), in which subjects carried  
596 out a one-arm bandit task. The reward probability was not fixed but changed abruptly; the authors  
597 used different volatility levels (i.e. different numbers of change points). Subjects had to learn this  
598 reward probability through experience in order to optimize their payoff.

599 Similarly, we generated sequences with low volatility (7 change points, see vertical plain black  
600 lines), and high volatility (see additional change points, vertical dashed dashed lines). The sequences  
601 were binary (absence or presence of reward) and the reward probability was resampled randomly after  
602 each change point. We consider two learning models: a hierarchical model, which estimates the  
603 reward rate, taking into account the possibility of change points; and a flat model that computes the  
604 reward rate near-optimally based on a fixed leaky count of observations, and a prior count of 1 for  
605 either outcome (see Methods). Contrary to Behrens et al, our hierarchical model does not estimate  
606 volatility, and therefore it cannot detect that the task comprises two volatilities; had we allowed for it,  
607 the observed modulations would have been even larger. Each model has a single free parameter which  
608 we fit to return the best estimate of the actual generative reward probabilities in both the low and high  
609 volatility conditions together. Keeping those best fitting parameters equal across both conditions, we  
610 measured the dynamic of the apparent learning rates of the models, defined as the ratio between the  
611 current update of the reward estimate ( $\theta_{t+1}-\theta_t$ ) and the prediction error leading to this update ( $y_{t+1}-\theta_t$ ).  
612 The hierarchical model shows a transient increase in its apparent learning rate whenever a change  
613 point occurs, reflecting that it gives more weights to the observations that follow a change point. Such



614 a dynamic adjustment of the apparent learning rate was reported in humans (Nassar et al., 2010). The  
615 flat model showed a qualitatively similar effect, despite the leakiness of its count being fixed. Note  
616 that since there are more change points in the higher volatility condition (dashed lines), the average  
617 learning rates of both models also increase overall with volatility, as previously reported in humans  
618 (Behrens et al., 2007).

619 The lines show mean values across 1000 simulations; s.e.m. was about the line thickness and  
620 therefore omitted.

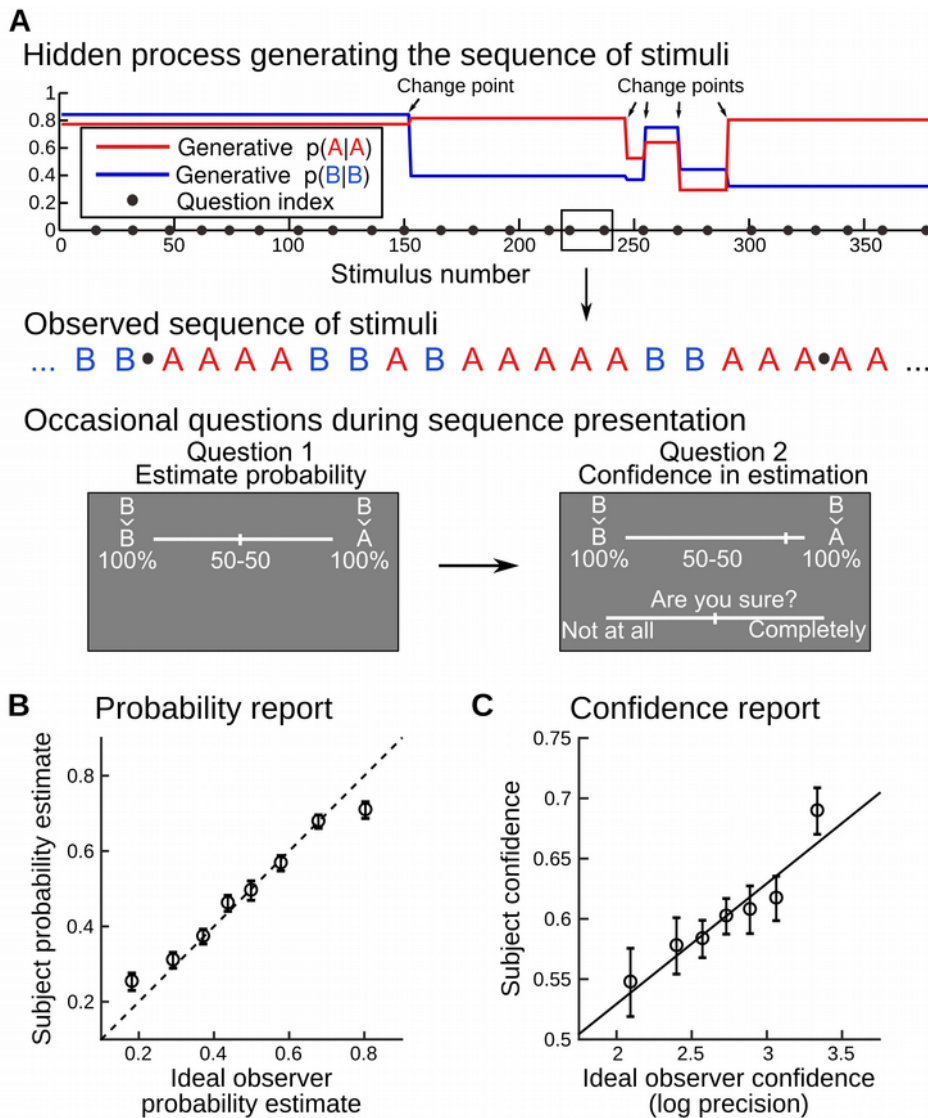

621 **Figure 2. Behavioral task: learning of dynamic transition probabilities with confidence**  
 622 **reports**

623 (A) Probability learning task. Human subjects (N=23) were presented with random sequences of  
 624 two stimuli A and B. The stimuli were, in distinct blocks, either auditory or visual and they were  
 625 perceived without ambiguity. At each trial, one of either stimulus was sampled according to a  
 626 probability that depended on the identity of the previous stimulus:  $p(A_t|A_{t-1})$  and  $P(B_t|B_{t-1})$ . These  
 627 transition probabilities underwent occasional, abrupt changes (change points). A change point could  
 628 occur at any trial with a probability that was fixed throughout the experiment. Subjects were  
 629 instructed about this generative process and had to continuously estimate the (changing) transition  
 630 probabilities given the observations received. Occasionally (see black dots in A), we probed their  
 631 inferences by asking them, first, to report the probability of the next stimulus (i.e. report their estimate  
 632 of the relevant transition probability) and second, to rate their confidence in this probability estimate.  
 633 (B, C) Subjects' responses were compared to an ideal observer model that solved the same task using

634 optimal Bayesian inference. Numeric values of confidence differ between subjects and models since  
635 they are on different scales (from 0 to 1 in the former, in log-precision unit in the latter). For  
636 illustration, the ideal observer values were binned, the dashed line (**B**) denotes the identity, the plain  
637 line (**C**) is a linear fit, and data points correspond to subjects' mean  $\pm$  s.e.m.

### A Key dissociation

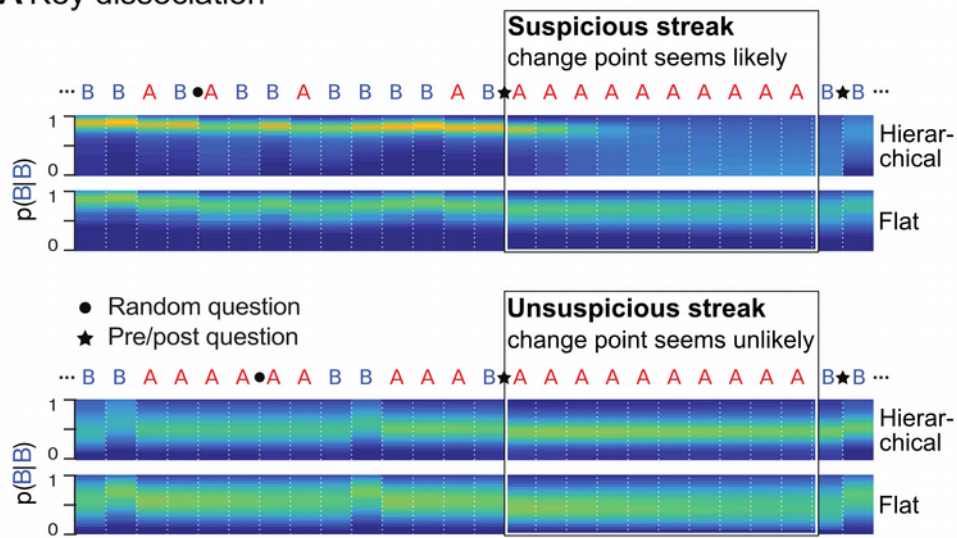

### B Theoretical predictions

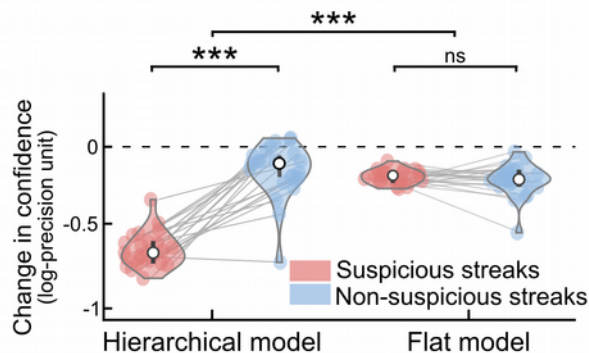

### C Subject data

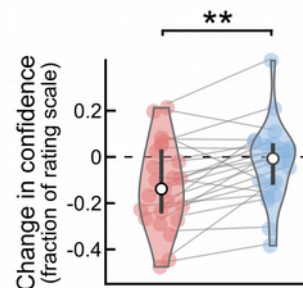

### 638 **Figure 3: A qualitative signature of hierarchical learning in confidence reports**

639 (A) Divergent predictions of hierarchical versus flat learning models. Two fragments of sequences  
 640 are shown in which one stimulus ('A') is consecutively repeated 10 times. In the upper fragment, this  
 641 streak of repetitions is highly unlikely (or 'suspicious') given the context, and may indicate that the  
 642 underlying statistics changed. By contrast, in the lower fragment, the same streak is not unlikely, and  
 643 does not suggest a change point. The heat maps show the posterior probability distribution of  $P(B|B)$ ,  
 644 i.e. the probability of a repetition of the *other* stimulus (B), estimated by the hierarchical and flat  
 645 models. In a hierarchical model, unlikely streaks arouse the suspicion of a global change in statistics,  
 646 causing the model to become uncertain about its estimates of both transition probabilities, despite  
 647 having acquired no direct evidence on  $P(B|B)$ . In a flat model, by contrast, a suspicious streak of A's  
 648 will not similarly decrease the confidence in  $P(B|B)$ , because a flat model does not track global  
 649 change points. To test for this effect, pre/post questions (indicated by a star) were placed immediately  
 650 before and after selected streaks, to obtain subjective estimates of the transition probability

651 corresponding to the stimulus *not observed* during the streak. Streaks were categorized as suspicious  
652 if they aroused the suspicion of a change point from the hierarchical ideal observer's viewpoint. Note  
653 that the flat model also shows a decrease in confidence, because it progressively forgets its estimates  
654 about  $P(B|B)$  during a streak of As, but, there is no difference between suspicious and non-suspicious  
655 streaks. **(B)** For the sequences presented to subjects, the change in confidence (post-streak minus pre-  
656 streak) was significantly modulated by streak type in the hierarchical model, but not in a flat model.  
657 **(C)** Subjects' confidence showed an effect of streak type predicted by the ideal hierarchical model. As  
658 in **Fig. 2C**, confidence values in subjects and models are on different scales. The error bars  
659 correspond to the inter-subject quartiles, distributions show subjects' data; significance levels  
660 correspond to paired t-test with  $p < 0.005$  (\*\*) and  $p < 10^{-12}$  (\*\*\*)).

### A Theoretical predictions

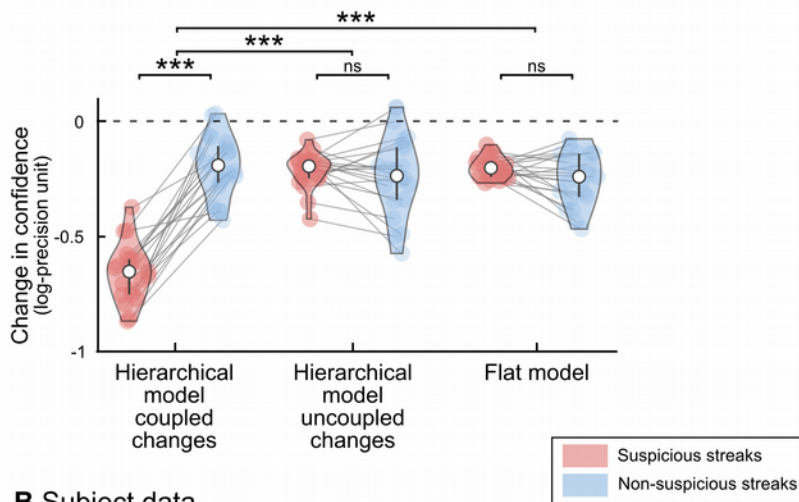

### B Subject data

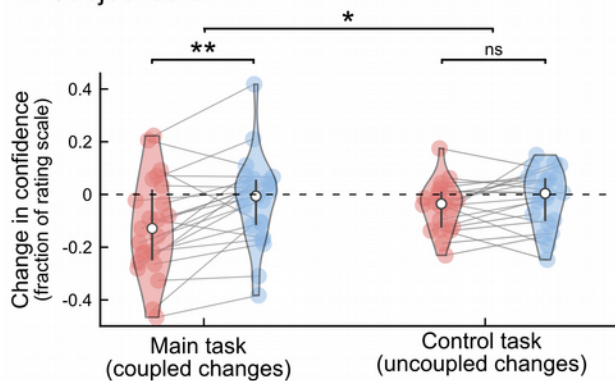

### C General performance in the control task

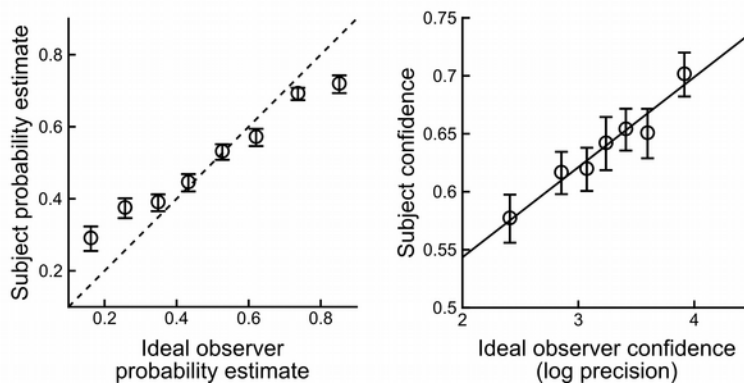

661 **Figure 4. Control experiment: subjects take into account the higher-order structure of**  
 662 **the dynamics**

663 Results of the control experiment, in which change points were uncoupled between the two  
 664 transition probabilities, thereby abolishing the possibility to infer a change in one transition  
 665 probability by only observing the other transition type. (A) Theoretical predictions for changes in  
 666 confidence around the target streaks. The optimal hierarchical model for the main task assumes that  
 667 change points are coupled (“hierarchical model, coupled changes”), which is no longer optimal in the  
 668 case of uncoupled change points. This model was nevertheless used to identify suspicious and non-  
 669 suspicious streaks and indeed it showed an effect of streak type on the change in confidence here in

670 the control task as in the main task (**Fig. 3C**). The optimal hierarchical Bayesian model for this  
671 control experiment is similar to this first model, the only difference is that it assumes that change  
672 points are uncoupled (“hierarchical model, uncoupled changes”). As expected, this model correctly  
673 showed no effect of streak type on the change in confidence. The flat model, by definition, ignores  
674 change points and therefore whether they are coupled or uncoupled, as a result it shows no effect of  
675 streak type (as in the main experiment). (**B**) Subjects showed no difference between streak types, like  
676 the hierarchical model for uncoupled changes. The results of the main task are reproduced from **Fig.**  
677 **3C** to facilitate visual comparison. (**C**) Subjects overall perform well in the control task, showing a  
678 tight agreement with the optimal hierarchical model for uncoupled change (the optimal ideal observer  
679 in this task) for both predictions (left) and confidence (right).

680 In panels **A** and **B**, the error bars correspond to the inter-subject quartiles, distributions show  
681 subjects' data. In panel **C**, data points are mean  $\pm$  s.e.m across subjects. In all panels; significance  
682 levels correspond to  $p < 0.05$  (\*),  $p < 0.01$  (\*\*),  $p < 0.001$ (\*\*\*) in a t-test.

683

## **SUPPLEMENTARY INFORMATION**



684 SUPPLEMENTARY FIGURES AND LEGENDS

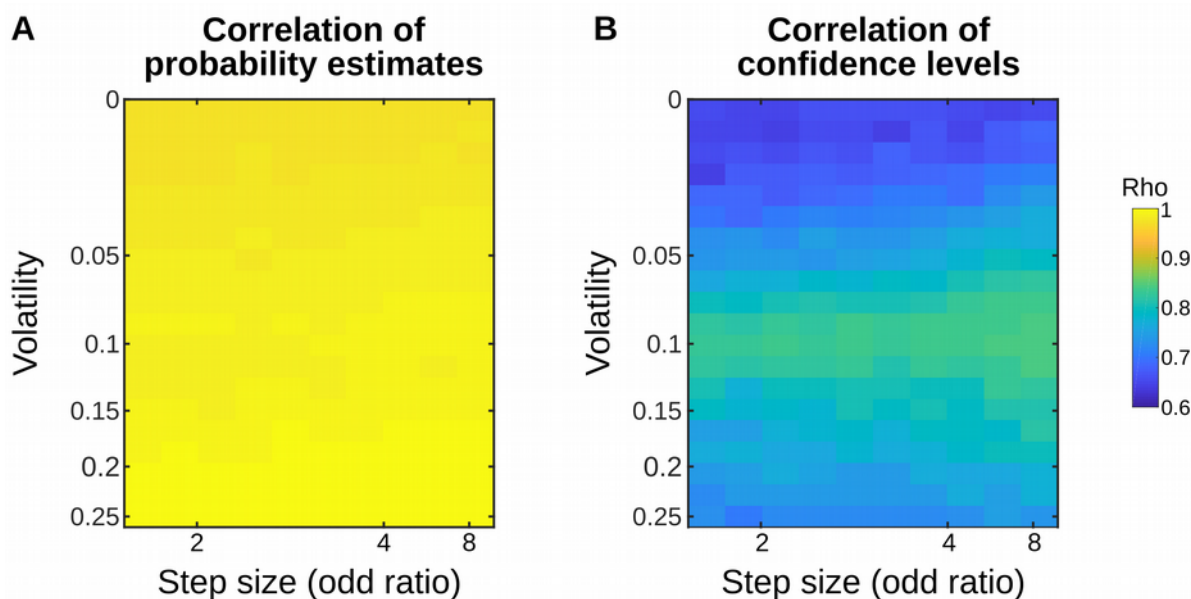

685 **Figure S1: Correlation between the hierarchical and flat models is different for probability**  
686 **estimates and confidence levels**

687 We ran simulations of our experiment (**Fig. 2A**) to assess which metric (probability estimates or  
688 confidence in those estimates) better distinguishes the hierarchical and flat learning models. For the  
689 sake of generality, we varied the volatility (probability of a change point in a sequence) and the step  
690 size of those changes (minimum fold change, in odd ratio, affecting the transition probabilities). For  
691 each combination of volatility and step size, we simulated 100 sequences to achieve stable results and  
692 we fit the single free parameter of each model (prior estimate of change point probability  $p_c$  in the  
693 hierarchical model; and leak factor  $\omega$  in the flat model) onto the actual generative probabilities of the  
694 observed stimuli in the sequences. The resulting parameterized models therefore return their best  
695 possible estimate of the hidden regularities, in each volatility-step size condition. We then simulated  
696 new sequences (again, 100 per condition) to measure the correlation between (A) the estimated  
697 probabilities of stimuli between the two models, and (B) the correlation (Pearson's rho) between the  
698 confidence (log-precision) that those models entertained in those estimates. The correlations indicate  
699 that probability estimates are nearly indistinguishable between the two models, whereas their  
700 confidence levels are more different.

701 Note that the volatility level (0.013) and step size (4) used in the experiment ensure that  
702 confidence levels greatly differ between models. Those simulations used prior [1 1] for the flat model,  
703 but the results are qualitatively similar with prior [0 0] (see Methods).

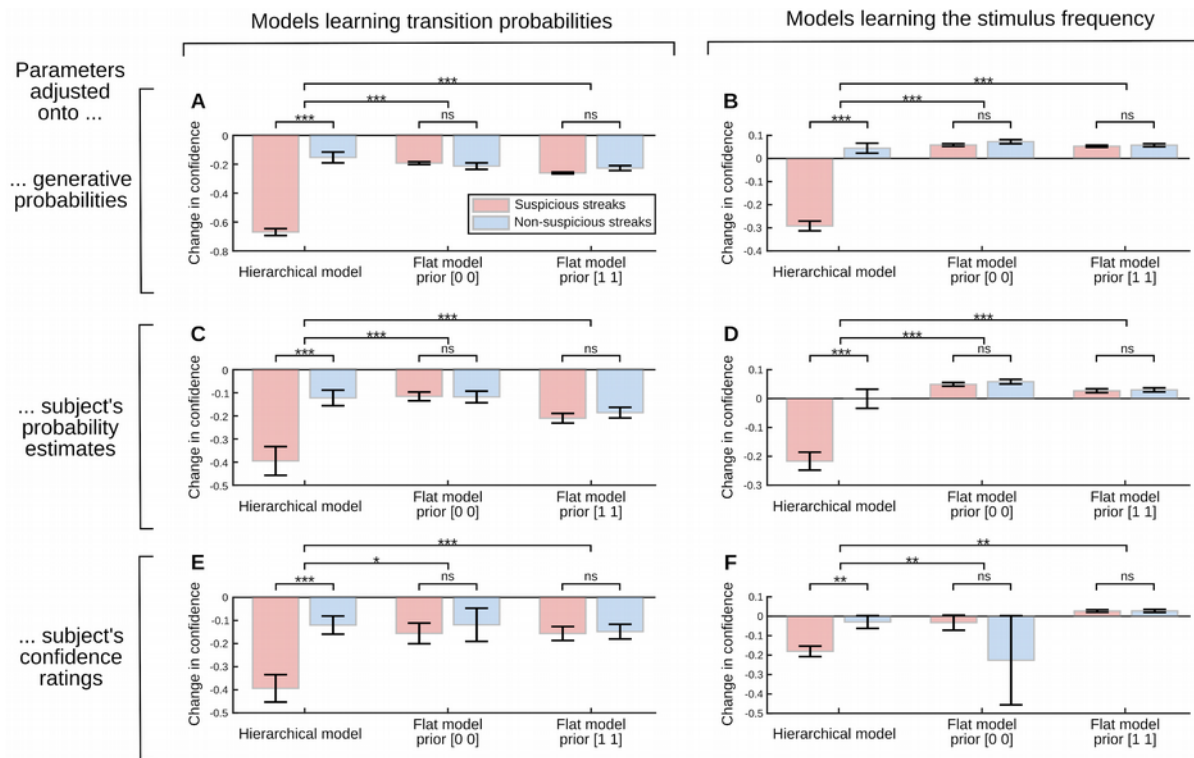

704 **Figure S2: Theoretical predictions for various alternative models**

705 Simulated changes in confidence around the target streaks in the main task. We consider three  
 706 ideal observers models: the hierarchical model, the flat model with prior [0 0] and with prior [1 1].  
 707 Those models tracked either the transition probabilities between successive stimuli (**A**, **C**, **E**) or the  
 708 frequency of stimuli (**B**, **D**, **F**). The free parameters of the models (the prior probability of change  
 709 point  $p_c$  in the hierarchical model; the leak factor  $\omega$  in the flat model) were fitted following three  
 710 procedures: so as to provide the best estimation of the actual generative probabilities of the sequences  
 711 at all trials (**A**, **B**) or the answers of subjects at the moment of all questions regarding probability  
 712 estimates (**C**, **D**) or their confidence ratings (**E**, **F**). Panels **A** and **B** therefore show the results of  
 713 models that were optimized to solve the probability estimation task. By contrast, panels **C**, **D**, **E**, **F**,  
 714 show the results of models that were optimized to be as close as possible to subjects, which can in  
 715 principle deviate from **A** and **B**.

716 Note that panel **A** corresponds to **Fig. 3B**, expanded with a new case (simulation of a flat model  
 717 with priors [1 1]). None of the flat models in all plots shows an effect of streak type; some even  
 718 predict increase (not decrease) in confidence (**B**, **D**, **F**). By contrast, a hierarchical model learning the  
 719 stimulus frequency (**B**, **D**, **F**) seems more compatible with the subject's data: they indeed predict an  
 720 effect of streak type. One could therefore wonder whether subjects actually monitor the item  
 721 frequency, instead of transition probabilities in the task. Several pieces of evidence argue against this

722 possibility (see **Supplementary Results 3**). In addition, this possibility is incompatible with the  
723 results of the control experiment (**Fig. 4B**): a model that estimates a single statistic, namely the item  
724 frequency and the associated confidence, shows the same effect of streak type no matter whether  
725 change points are coupled between transition probabilities (main experiment) or uncoupled (control  
726 experiment).

727 Data points are mean  $\pm$  s.e.m of model predictions for each subject; significance levels correspond  
728 to  $p < 0.05$  (\*),  $p < 0.01$  (\*\*),  $p < 0.001$  (\*\*\*) in paired t-test, except for comparisons involving the flat  
729 model with prior [0 0] in **F** for which we used a Wilcoxon sign rank test because of an outlier point  
730 (see large error bar).

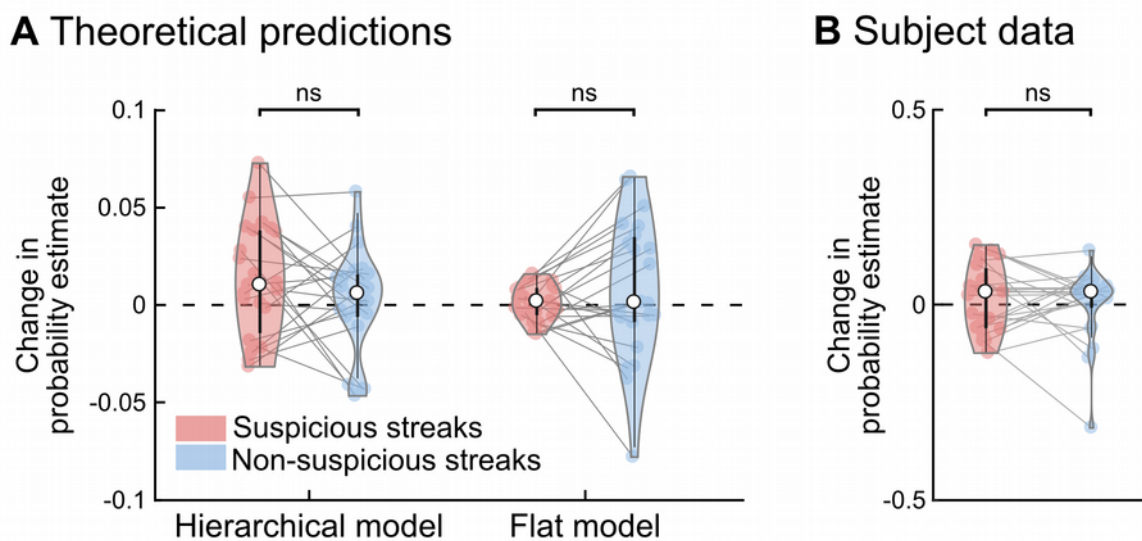

731 **Figure S3: Probability estimates show no effect of streak type**

732 This figure is analogous to **Fig. 3B-C**, excepted that it shows probability estimates reported at the  
733 moment of the pre/post streak questions, rather than the associated confidence levels. The error bars  
734 correspond to the inter-subject quartiles, distributions show subjects' data; the significance level 'ns'  
735 corresponds to paired t-tests with  $p > 0.15$ .

## 736 SUPPLEMENTARY RESULTS

### 737 **1 - Relation between the flat model and the delta rule**

738 The equations of the flat model can be re-arranged so as to show the link with a leaky integrator,  
 739 and hence, to a delta rule. For simplicity we derive those equations for the Bernoulli case (when one  
 740 seeks to infer the frequency of items in a sequence), noting that the case of transition probabilities  
 741 between successive items ( $p(A|A)$ ,  $p(B|B)$ ) is nothing but the Bernoulli case when looking at each  
 742 transition type separately (AA, BB).

743 Let's recode the binary sequences as 1s and 0s, and estimate the probability  $P_1(n)$  of observing a 1  
 744 after a sequence of observations  $y_1, \dots, y_n$ .  $P_1(n)$  is the mean of a beta distribution, whose parameters  
 745 are the (leaky) counts of observations and the prior count (cf. Eq. 3 and 5). Using the analytical  
 746 solution for beta distributions, and recalling that the observation count is leaky, with exponential  
 747 decay  $\omega$ :

$$\begin{aligned}
 P_1(n) &= \frac{N_1 + N_1^{prior}}{N_1 + N_0 + N_1^{prior} + N_0^{prior}} \\
 &= \frac{\sum_{t=1}^n y_t (e^{-1/\omega})^{n-t} + N_1^{prior}}{\sum_{t=1}^n (e^{-1/\omega})^{n-t} + N_1^{prior} + N_0^{prior}} \\
 &= c \sum_{t=1}^n y_t (e^{-1/\omega})^{n-t} + c N_1^{prior}
 \end{aligned}
 \tag{Eq 6}$$

749 Where  $c$  can be approximated by a constant since  $e^{-1/\omega} < 1$  and  $n$  is typically large:

$$\begin{aligned}
 c &= \frac{1}{\frac{1 - e^{-n/\omega}}{1 - e^{-1/\omega}} + N_1^{prior} + N_0^{prior}} \\
 &\approx \frac{1}{\frac{1}{1 - e^{-1/\omega}} + N_1^{prior} + N_0^{prior}}
 \end{aligned}$$

750 A delta-rule with learning rate  $\alpha$  reads as follow:

$$\begin{aligned}
 P_1(n) &= (1 - \alpha)^n P_1(0) + \alpha \sum_{t=1}^n y_t (1 - \alpha)^{n-t} \\
 &\approx \alpha \sum_{t=1}^n y_t (1 - \alpha)^{n-t}
 \end{aligned}
 \tag{Eq 7}$$

752 Note that for large  $n$ , the term before the sum vanishes since  $(1-\alpha)<1$ , hence the approximation on  
753 the second line.

754 Comparison of Eq. 6 and 7 shows that the flat model and the delta rule are very similar, the only  
755 difference is that the leaky integration constantly adds a prior count in the flat model, whereas in the  
756 delta-rule, the impact of the starting point  $P_1(0)$ , which can be thought of as a prior, vanishes as more  
757 observations are accumulated. Stated differently, in the flat model, the inference progressively forgets  
758 about previous observations (like in the delta rule) and constantly factors in a prior about the  
759 estimated quantity (unlike the delta rule). Note that with  $N^{\text{prior}_1} = N^{\text{prior}_0} = 0$ , both models become  
760 asymptotically identical for large  $n$ .

761 Computing the apparent learning rate (the ratio between update  $P_1(n)-P_1(n-1)$  and prediction error  
762  $y_n - P_1(n-1)$  leading to this update) shows, with a bit of math, that for typical choices of  $\omega$ ,  $N^{\text{prior}_1} > 0$  and  
763  $N^{\text{prior}_0} > 0$ , the apparent learning rate increases whenever two consecutive observations are identical,  
764 and decreases whenever they differ. Considering that consecutive observations are more likely to  
765 differ after a change point in the underlying generative probability, the learning rate of the flat model  
766 typically increases, on average, immediately after change points (see **Fig. 1**).

## 767 **2 - Robustness of the results**

768 Each subject performed four blocks, two with auditory stimuli and two with visual stimuli. We  
769 tested the robustness of the linear relations between subject's and optimal values (**Fig. 2B-C**) by  
770 testing them separately in each block type. We found that the results were replicated in each sensory  
771 modality. For probability estimates, in the auditory modality  $\beta=0.69\pm 0.07$  s.e.m.,  $t_{22}=9.27$ ,  $p=4.7 \cdot 10^{-9}$ ;  
772 in the visual modality  $\beta=0.64\pm 0.06$  s.e.m.,  $t_{22}=10.32$ ,  $p=6.8 \cdot 10^{-10}$ . For confidence, in the auditory  
773 modality  $\beta=0.10\pm 0.04$  s.e.m.,  $t_{22}=2.85$ ,  $p=0.009$ ; in the visual modality  $\beta=0.09\pm 0.03$  sem,  $t_{22}=2.81$ ,  
774  $p=0.010$ . Interestingly, the regression coefficients were correlated across subjects between modalities  
775 (probability estimates:  $\rho_{23}=0.45$ ,  $p=0.031$ ; confidence ratings:  $\rho_{23}=0.81$ ,  $p=2.6 \cdot 10^{-6}$ ), suggesting that  
776 inference in this task operates at an abstract, amodal level.

777 We further tested the robustness of the correlation between subject's and optimal values by  
778 restricting the regression analysis to a subset of data points, namely, the questions that surround the  
779 target streaks (**Fig 3A**). The significant correlations were replicated on this subset of data for both  
780 probability estimates ( $\beta=0.57\pm 0.07$  s.e.m.,  $t_{22}=7.6$ ,  $p=1.4 \cdot 10^{-7}$ ) and confidence ratings ( $\beta=0.12\pm 0.05$   
781 s.e.m.,  $t_{22}=2.6$ ,  $p=0.017$ ).

782 We also tested the robustness of our central analysis of the effect of streak type on the change in  
783 confidence. In the main text, we report a dichotomy between suspicious and non-suspicious streaks,  
784 but in reality the 'suspiciousness' of a streak is a matter of degree: the more a streak arouses the  
785 suspicion of a change, the larger the decrease in confidence. We therefore regressed the subject's

786 changes in confidence onto the hierarchical model's changes in confidence across all streaks. In order  
787 to test whether the hierarchical model or the flat model provides a better account of the subjects' data,  
788 we also include the change in confidence of the flat model as a competing explanatory variable in the  
789 multiple regression. Regression coefficients were significant for the hierarchical model ( $\beta=0.07\pm 0.02$   
790 s.e.m.,  $t_{22}=3.7$ ,  $p=0.001$ ), but not for the flat model ( $\beta=0.01\pm 0.01$  s.e.m.,  $t_{22}=0.8$ ,  $p=0.44$ ), and the  
791 regression coefficients of the hierarchical model were significantly larger than those of the flat model  
792 (paired difference of  $\beta_s=0.06\pm 0.03$  s.e.m.,  $t_{22}=2.3$ ,  $p=0.031$ ), indicating that the hierarchical model  
793 provides a significantly better account of the subjects' data.

### 794 **3 - Normative properties of confidence reports**

795 In the ideal observer model, the answers to questions #1 and #2 (probability estimate and  
796 confidence rating) are different readouts of the same posterior distribution, namely its mean and log-  
797 precision. If the subjects' answers to those questions also derive from the same inference process, then  
798 we expect that subjects who are closer to the optimal probability estimates are also those who are  
799 closer to the optimal confidence ratings. We therefore tested whether the linear regression coefficients  
800 ( $\beta$ s) linking subjects and the optimal hierarchical model were correlated between probability estimates  
801 and confidence ratings. The between-subject correlations was indeed significant:  $\rho_{23}=0.53$ ,  $p=0.009$ .

802 We tested for further normative properties of the subject's confidence ratings. Several factors,  
803 notably factors pertaining to first-order estimates, are expected to impact confidence ratings in this  
804 task from a normative viewpoint. We first show that those factors indeed impact the optimal  
805 confidence levels at the moments of questions during the task, and then report a similar analysis for  
806 the subject's confidence ratings. Optimal confidence levels were entered into a multiple regression  
807 model which included the estimated probability itself, the entropy of this probability (which quantifies  
808 the estimated unpredictability of the next stimulus, it culminates when the estimated probability is  
809 0.5), and the extent to which the current observation deviates from the previous estimate, as quantified  
810 by the surprise (negative log likelihood of the observations, (Shannon, 1948)) and the prediction error  
811 (one minus the likelihood of the current observation). Optimal confidence was lower when the  
812 estimated entropy was higher ( $\beta=-0.051\pm 0.008$ ,  $t_{22}=-6.1$ ,  $p=4.2 \cdot 10^{-6}$ ), lower when surprise was larger  
813 ( $\beta=-0.142\pm 0.026$ ,  $t_{22}=-5.4$ ,  $p=1.8 \cdot 10^{-5}$ ) and when prediction error was larger ( $\beta=-0.128\pm 0.030$ ,  $t_{22}=-4.2$ ,  
814  $p=3.5 \cdot 10^{-4}$ ).

815 To analyze subjects' confidence ratings, we added other explanatory variables to this multiple  
816 linear regression model, which correspond to subject's estimates: the subject's probability estimate,  
817 and the entropy corresponding to this estimate. Note that questions are asked only occasionally, so  
818 that we don't know the probability estimate of the subject at the *previous trial*, and therefore, we  
819 cannot compute the subject's surprise and prediction error elicited by the last observation. Subject's  
820 confidence was lower when the entropy of his estimate was higher ( $\beta=-0.125\pm 0.009$ ,  $t_{22}=-14.5$ ,  $p=1.0$

821  $10^{-12}$ ) and when the optimal surprise level was higher ( $\beta=-0.090\pm 0.022$ ,  $t_{22}=-4.1$ ,  $p=5.0 \cdot 10^{-4}$ ).

822 Another aspect of subjects' accuracy is that their report of confidence is specific to the relevant  
823 statistics. In the experiment, subjects monitor two transition probabilities, there are therefore two  
824 confidence levels, each being attached to one transition type. Questions asked subjects to estimate the  
825 likelihood of the next stimulus, which depends on only one of the two transition probabilities: the one  
826 that is relevant given the identity of the previous stimulus at the moment of the question. We  
827 estimated a multiple linear regression in which the subject's confidence ratings was regressed onto  
828 both the optimal relevant confidence levels, and the optimal irrelevant confidence level (those  
829 attached to the irrelevant transition). The regression coefficients corresponding to the relevant  
830 confidence levels were significant ( $\beta=0.039\pm 0.014$  s.e.m.,  $t_{22}= 2.8$ ,  $p=0.011$ ), those for the irrelevant  
831 confidence were not ( $\beta=0.001\pm 0.008$  s.e.m.,  $t_{22}=0.1$ ,  $p=0.89$ ) and the difference between the two was  
832 significant (paired difference of  $\beta_s=0.038\pm 0.018$  s.e.m.,  $t_{22}=2.0$ ,  $p=0.027$ , one-tailed test). A different  
833 multiple linear regression indicates, in addition, that confidence ratings are selectively modulated by  
834 the (optimal) entropy of the relevant transition probability, as opposed to the irrelevant one (paired  
835 difference of  $\beta_s=-0.020\pm 0.007$  s.e.m.,  $t_{22}=-2.9$ ,  $p=0.008$ ). Optimal confidence levels show the same  
836 effect: replacing the subjects' confidence ratings in this latter regression with the optimal confidence  
837 levels also reveals a significant difference (paired difference of  $\beta_s=-0.050\pm 0.016$ ,  $t_{22}=-3.2$ ,  $p=0.0045$ ).  
838 By contrast, such a difference is not observed when replacing the subjects' confidence ratings with the  
839 optimal confidence of a model that monitors solely the frequency of items (paired difference of  
840  $\beta_s=0.005\pm 0.008$ ,  $t_{22}=0.6$ ,  $p=0.54$ ). Together, those results indicate that subjects reported specifically  
841 the confidence attached to the transition probability relevant at the moment of the question.

#### 842 **4 - Theoretical effects on the apparent learning rate**

843 We cannot assess the apparent learning rate of subjects on a trial-by-trial basis here since it would  
844 require that subjects report their first-order estimates on every trial, whereas they did it only  
845 occasionally. However, we can run such an analysis on our simulated models. We found a specific  
846 effect of streak type on the apparent learning rate of the hierarchical model, which increased more  
847 after suspicious streaks than non-suspicious ones ( $0.11\pm 0.01$  s.e.m.,  $p=2.9 \cdot 10^{-14}$ ,  $t_{22}=17.2$ ), there was  
848 no difference in the flat model ( $-0.0023\pm 0.0022$  s.e.m.,  $p=0.3$ ,  $t_{22}=-1.1$ ) and the difference between  
849 models was significant (paired difference of differences,  $-0.11\pm 0.01$  s.e.m.,  $p=1.4 \cdot 10^{-14}$ ,  $t_{22}=-17.9$ ).  
850 This effect of streak type in the hierarchical model for uncoupled change points was no longer  
851 observed in the control task with uncoupled change points ( $-0.001\pm 0.005$  s.e.m.,  $p=0.85$ ,  $t_{20}=-0.2$ ). In  
852 other words, the apparent learning rate passes the test we propose to detect the use of a hierarchical  
853 model.



## 854 SUPPLEMENTARY DATA

855 We provide the raw data as a Matlab data file: *HierarchyTasks\_FullRawDataSet.mat*. This data  
856 file can be read with Matlab, or a freely available software such as GNU Octave or Python. The file  
857 contains three cell variables: one for the subjects included in the main task, one for the subjects  
858 excluded from the main task, and one for the subjects (all included) in the control task. Each element  
859 of a cell corresponds to one subject, and the data are presented as a matrix. Each row is a trial, and the  
860 columns should be read as follows:

- 861 1. Sensory modality ("1" for visual, "0" for auditory)
- 862 2. Block number (1 to 4)
- 863 3. Observed binary sequence, coded as "1" and "2"
- 864 4. Generative probability of observing "1" when the previous stimulus is "2"
- 865 5. Generative probability of observing "2" when the previous stimulus is "1"
- 866 6. Subject's estimate of the probability of receiving "1" on the next trial, from 0 to 1 (with NaN  
867 when no question is asked)
- 868 7. Subject's confidence about the estimated probability, from 0 to 1 (with NaN when no question  
869 is asked)
- 870 8. Reaction times (s) for the probability report (with NaN when no question is asked)
- 871 9. Reaction time (s) for the confidence report (with NaN when no question is asked)
